## **Title**

Exploring the creation or adaptation of knowledge mobilization products for culturally and linguistically diverse audiences: a scoping review

## **Authors**

Sarah A Elliott<sup>1,2</sup>, Shannon D Scott<sup>3</sup>, Liza Bialy<sup>1</sup>, Kelsey Wright<sup>1</sup>, Lisa Hartling<sup>1,2</sup>

## **Affiliations**

<sup>1</sup> Alberta Research Centre for Health Evidence, Department of Pediatrics, Faculty of Medicine and Dentistry, University of Alberta

<sup>2</sup> Cochrane Child Health, Department of Pediatrics, University of Alberta

<sup>3</sup> Faculty of Nursing, University of Alberta

## **Contact Author**

Dr. Sarah Elliott

se2@ualberta.ca

4-474 Edmonton Clinic Health Academy

11405 87th Ave

Edmonton, AB Canada T6G 1C9

## Abstract

**Introduction:** Connecting end-users to research evidence has the power to improve patient knowledge and inform health decision-making. However, recognized barriers to or determinants of effective knowledge mobilization (KMb) are differences in culture and language among the end users of the evidence. This scoping review set out to understand current processes and practices when creating or adapting KMb products for culturally and linguistically diverse (CALD) audiences.

**Methods:** We searched 3 databases (Ovid Medline, CINAHL via EBSCOhost, PsychINFO) from 2011 until August 2021. We included any literature about KMb product creation or adaptation processes serving CALD communities. A primary reviewer screened all identified publications and a second reviewer screened publications excluded by the primary. Data were extracted using a standardized form by one reviewer and 10% were verified by a second reviewer. Studies were categorized by type of adaptation ('surface' or 'deep' structure) and mapped based on type of stakeholder engagement used (i2S model). A search update was run in July 2023, and screening and extraction are in progress.

**Results:** Seven thousand four hundred and five unique titles and abstracts were reviewed, 319 full-text studies were retrieved and reviewed, and 24 studies were included in final data extraction and mapping. Fifteen studies (63%) created or adapted exclusively text-based KMb products such as leaflets and pamphlets and 9 (38%) produced digital products such as videos (n=4, 16%), mobile applications (n=3, 13%), website (n=1, 4%) and a CD ROM (n=1, 4%). Eight studies (33%) reported following a framework or theory for their creation or adaptation efforts. Only five studies (21%) demonstrated 'deep structure' cultural sensitivity and applied all five (Inform, Consult, Involve, Collaborate, and Support) levels of stakeholder engagement. Four (17%) studies included reflections from the research teams on the processes for creating or adapting KMb products for CALD communities.

**Conclusion:** Included studies cited a variety of methods in creating or adapting KMb products for CALD communities. Successful uptake of created or adapted KMb products was often the result of collaboration with end-users for more applicable, accessible and meaningful products. Further research developing guidance and best practices is needed to support the creation or adaptation of KMb products with CALD communities.

## Introduction

Knowledge mobilization (KMb) (an umbrella term encapsulating knowledge translation, knowledge transfer, and knowledge exchange)<sup>1</sup> is based on communicating scientific evidence to relevant end-users<sup>2</sup>. Within healthcare, KMb products (e.g. patient decision aids, educational resources) can help patients and families in their healthcare decision-making to improve health outcomes and reduce health system costs.<sup>3</sup> Successful uptake of evidence is contingent on relevance of the KMb products for the target end-user.<sup>2</sup> However, some recognized barriers or determinants of effective KMb are differences in culture and language among the end-users of the evidence.

While KMb efforts have advanced substantially in the field of health promotion over the last decade, predominant cultures often comprise the accessible pool of engaged end-users.<sup>4, 5</sup> Subsequently, KMb products frequently entail English communication, and mainstream images not conveying relevance to minority cultures. Similarly, most KMb products assume end-users possess a certain level of health literacy and are relatively familiar with their healthcare system, which may not represent the experiences of many newcomer cultural groups. Public health agencies (e.g. Health Canada) sometimes provide linguistic translations of healthcare information for common languages; however, linguistic translation does not guarantee accessibility and relevance of healthcare information for the target communities. Instead, nuanced visuals, relevant terms, and overall cultural sensitivity have proved more desirable for end-users.<sup>6</sup>

Resnicow and colleagues<sup>7</sup> have proposed that cultural adaptation consists of two dimensions: surface structure and deep structure. Aspects of culture that are easily observable to external onlookers like language, clothing, and ethnicity would fall under surface structure, while historical and psychological influences on health decisions would fall under deep structure. Though admittedly gray in nature, the delineation of surface and deep aspects provides potential categories of cultural adaptation. In terms of the application of cultural sensitivity, efforts to develop or adapt KMb products could include surface structures of language and appearance of end-users, as well as deep structures of historical barriers and psychological stressors for end-users.<sup>8</sup> Resnicow and colleagues suggest that both surface and deep structures of cultural knowledge are essential for

well-rounded cultural adaptations, and encourage the involvement of end-users to understand the nuanced aspects.

Types and extent of end-user engagement can also vary in KMb product creation and adaptation. <sup>9-11</sup> Bammer <sup>12</sup> proposed a modified version of the International Association for Public Participation (IAP2) stakeholder engagement model, where researchers are positioned as support for the directions chosen by end-users, rather than decision-makers themselves. The positioning of end-users as experts in their own information needs and preferences mirrors other public participation frameworks often employed by health researchers (e.g. Participatory Action Research (PAR), <sup>13</sup> Community-Based Participatory Research (CBPR), <sup>14</sup> etc.). Both cultural adaptation and end-user engagement appear to be core pillars in KMb product creation and adaptation.

While there are several processes (e.g. translation and cultural brokerage, ecological validity model) of cultural adaptation that have been previously applied to adapt health intervention programs, <sup>15</sup> and patient reported outcome scales, <sup>16</sup> no guidance currently exists on how best to develop or adapt KMb products that reach diverse end-user needs. As an initial step towards creating a unified, effective KMb product creation or adaptation best practices, this scoping review (ScR) aimed to map what approaches researchers have used to culturally and linguistically adapt KMb products. The following questions guided this scoping review:

### **Key questions**

1. What *approaches* have researchers used when creating or culturally adapting KMb products for culturally and linguistically diverse (CALD) end-users?
2. What are the *key considerations* when creating or culturally adapting KMb products for CALD end-users?

Understanding what methods have previously been used, resources required, as well as key considerations for how best to create or adapt KMb products will support researchers and healthcare organizations in developing or adapting effective resources for CALD communities.

## Methods

### *Review methods*

This ScR followed the methodological framework proposed by Arksey and O'Malley,<sup>17</sup> enhanced by Levac et al.<sup>18</sup> Specifically, we followed these six steps: (1) identifying the research question; (2) identifying the relevant studies; (3) study selection; (4) charting the data; (5) reporting the results and (6) consultation. Reporting of the review adheres to the Preferred Reporting Items for Systematic Reviews and Meta-Analyses (PRISMA) – 2018 Extension for Scoping Review.<sup>19</sup>

### *Search strategy*

In collaboration with a research librarian and content experts, we developed and refined a comprehensive search strategy. The strategy combined subject headings and keywords for terms related to KMb, knowledge exchange, knowledge mobilization, cross-culture, culturally appropriate, CALD communities, and adaptation of health information and implementation science. On August 12, 2021 we searched Ovid Medline (1946-), CINAHL via EBSCOhost (1937-), PsycINFO (2002-), as well as ProQuest Dissertations & Theses Global to identify grey literature. Search results were exported to EndNote V.X7 (Clarivate Analytics) and duplicates removed before the file was provided to reviewers for screening in Microsoft Excel. The search was limited to English language, peer-reviewed studies published in academic journals from 2011 to August 2021. A search update was run in July 2023, screening and data extraction for the update is in progress.

### *Study selection*

All published study design types and secondary evidence syntheses were included if they contained a patient, public or consumer population and culturally created or adapted a KMb product. We defined a KMb product as any health research-based product that supported decision-making to provide explicit recommendations, and/or meet knowledge needs. We excluded any studies that only performed purely linguistic translations of a KMb product or the validation of translated measurement tools/questionnaires. Interventions without standalone KMb products for end-user decision making were also excluded.

### *Screening*

One reviewer screened titles and abstracts of each study as “include/unsure” or “exclude” based on a priori inclusion criteria (Supplementary Material 1). A second independent reviewer verified all studies excluded by the first reviewer. Both reviewers performed a pilot screen where they independently screened 10% of the studies to assess consistency. Two independent reviewers reviewed the full-text of each included study from the primary screening. When agreement on a citation or full-text could not be reached between two reviewers, a third senior reviewer was consulted for resolution.

### *Data extraction*

The following details were extracted from each study: publication characteristics, study design, population, KMb product description, methods of creation or adaptation, stakeholder engagement processes, KMb product evaluation processes, and reflections from researchers. Data were collected using a standardized form by one reviewer and verified by a second reviewer. Any discrepancies were resolved through a third-party decision.

### *Data analysis*

We performed a narrative synthesis, guided by a qualitative content analysis approach<sup>20</sup> to summarize the quantity, content, and coverage of the evidence including summary statistics on studies examining the different ways of culturally developing or adapting KMb products. Processes for creation or adaptation were mapped into five categories (Product creation, Literature search, Stakeholder engagement, Resources utilized, Evaluation) representing different methods reported throughout the literature.

Cultural adaptations were categorized into two broad groups, surface and deep structure.<sup>7, 21</sup> Surface structure involved coordinating materials and messages to observable characteristics of the target population (i.e., imagery, sounds, backgrounds, clothing, etc.). Deep structure involved contextualizing the social, historical, environmental, and psychological features of the proposed end-user group. Additionally, Bammer’s iS2 version<sup>12</sup> of the IAP2 Spectrum of Public

Participation was used to classify levels of engagement across each study.<sup>22, 23</sup> The i2S is a spectrum of engagement across five stages: informing stakeholders of health information and research processes, consulting with stakeholders for relevant cultural considerations, involving stakeholders throughout the research processes, collaborating with stakeholders in research decisions, and supporting stakeholders in designing and implementing appropriate and desirable research and dissemination methods.

## Results

### *Search results*

The search strategy (Supplementary Material 2) captured 9,677 studies. After removing duplicates, 7,405 unique studies were screened by title and abstract. Of these, the full-text of 319 were reviewed and 24 met eligibility criteria and were included in the review. The PRISMA flow diagram (Figure 1) provides a detailed outline of the screening and selection process.

### *Study characteristics*

Table 1 provides a summary of the included studies' characteristics. The majority of studies were from USA (54%, n=13) and Canada (13%, n=3) with a single study from each of the following countries: United Kingdom, Portugal, Norway, Israel, United Arab Emirates, Denmark, New Zealand, and Egypt. Most of the studies used qualitative methods (83%, n=20) followed by mixed methods (13%, n=3) and quantitative methods (8%, n=2). Fourteen (58%) reported the age of participants, most (n=12, 86%) focused on adult populations, two (14%) on adolescents, and 10 (42%) did not report on age.

End-user groups varied across the included studies, with Indigenous English speakers (17%, n=4) and Latinx Spanish speakers (17%, n=4) as the most frequently reported cultural communities served. Health topics of the KMb products included: diabetes (13%, n=3), organ donation (8%, n=2), mental health conditions (8%, n=2), prenatal care (8%, n=2), cancer (8%, n=2), HPV vaccine (8%, n=2), health literacy (8%, n=2), and acute otitis media, Autism Spectrum Disorder, breastfeeding, dementia, hypertension, pain, , reproductive choice, sexual health, substance use each presented in a single study. Fifteen studies (63%) created or adapted exclusively non-digital

KMb products such as leaflets and pamphlets and 9 (38%) produced digital products such as videos (n=4, 16%), mobile applications (n=3, 13%), website (n=1, 4%) and a CD ROM (n=1, 4%).

### Knowledge Product Creation

Full details of reported creation or adaptation processes are outlined in Table 2.

#### *Creation or Adaptation Processes*

Each included study followed unique processes for developing or adapting a KMb product for CALD communities. Thirteen studies (54%) reported the processes of developing a new KMb product, while eleven studies (46%) outlined their process for adapting a pre-existing KMb product for a specific end-user group. Thirteen studies (54%) reported a preparatory information gathering process, where literature reviews (42%, n=10), conversations with community agencies (13%, n=3), or a combination thereof (13%, n=3) provided background to direct creation of the KMb product.

#### *Stakeholder Engagement*

Most adaptations involved stakeholders through interviews (n=10, 42%) and focus groups (n=7, 29%). A few of the studies engaged groups of participants through interactive workshops<sup>24, 25</sup> and structured group brainstorming sessions.<sup>26</sup> A study that created a prenatal education booklet for Indigenous women in Wyoming initiated the process by building trusting relationships with women from reservations and those attending health conferences.<sup>27</sup> These women were then asked to join a volunteer committee to develop culturally appropriate materials. The investigators noted that it took time to build trust with the women individually as well as within the committee.

#### *Resources Utilized*

Most studies (n=22, 92%) reported some or all of the human resources they utilized during their cultural adaptation process. The involvement of health care professionals was the most prevalent (n=11, 46%), followed by translators (n=8, 33%) and graphic artists or animators (n=7, 29%). Two studies used specialists to moderate their process, one study<sup>24</sup> had a participatory design expert to assist with guiding exercises and another study<sup>28</sup> used an experienced moderator to lead their sessions.



### *Evaluation*

Nineteen studies (79%) described some form of evaluation for their newly created KMb product, including piloting through surveys, interviews, and focus groups; of these, only 12 (63%) studies reported the results of their evaluation. All studies reporting results focused on evaluating the created or adapted product for use with end-users. Assessments included usability testing, use or knowledge gained through use of the KMb product. However, none of the adaptation processes involved an assessment of end-user engagement and involvement when adapting or creating the KMb product.

### Cultural Adaptations

Details regarding the type of cultural components used and level of stakeholder engagement are presented in Table 3.

### *Approach and Type of Adaptation*

Two studies (8%) cited using a CBPR<sup>14</sup> approach, and eight studies (33%) reported using a framework, theory or model to guide their creation or adaptation efforts. All studies utilized surface structure cultural components and most (83%, n=20) included deep structural components in their creation or adaptation processes. To achieve deep structure contextualization authors most commonly consulted specific end-user populations (e.g. clinical populations [21%, n=5],<sup>25, 29-32</sup> community members [17%, n=4]<sup>24, 27, 33, 34</sup> through focus groups (13%, n=3),<sup>28, 35, 36</sup> and assessed various cultural contexts (33%, n=7).<sup>26, 37-41</sup>

### *Level of Stakeholder Engagement*

Five studies<sup>24, 27, 34, 37, 41</sup> (21%) reported stakeholder engagement approaches representative of all five levels of the i2S version of the IAP2 framework (inform, consult, involve, collaborate, and support). These five studies (21%) created stakeholder committees that were actively involved throughout all phases of the creation or adaptation process. For the remaining 19 (79%) studies, regardless of other stakeholder engagement performed, some form of consultation with stakeholders to learn about cultural considerations were conducted. These consultations were reported to direct deep structure cultural sensitivity considerations for twenty-one of the studies included (88%). With the exception of three<sup>32, 36, 42</sup> studies (13%), the remaining involved

stakeholders throughout the research process, and ten<sup>25, 29, 31, 33, 36, 39, 43-46</sup> (42%) of the project researchers collaborated with stakeholders. Only two<sup>29, 33</sup> studies (8%) informed their stakeholders about the research process, and another two<sup>39, 44</sup> (8%) provided support to stakeholders for implementation and dissemination of the KMb product.

### *Researcher Reflections*

Only four (17%) studies included reflections from the research team on the processes for adapting or developing KMb products. Notably, researchers emphasized the importance of forming stakeholder relationships before and throughout the research process,<sup>24</sup> that communication between multiple stakeholder groups can be time-consuming,<sup>25</sup> that initial positive reception to adapted products does not guarantee adherence to behavior change,<sup>40</sup> but that the process of adapting KMb products can be rewarding for researchers (e.g. meeting end-users needs).<sup>32</sup>

## **Discussion**

This ScR provides an outline of documented processes used to develop or adapt KMb products for CALD communities, highlights gaps in that literature, and provides direction for future research. As a means of addressing the needs of populations often underserved by health systems, researchers and organizations have begun adapting their KMb products for CALD communities. To the best of our knowledge, this is the first review to synthesize and examine literature on processes and key considerations for adapting or developing KMb products. There appears to be a range of methods employed to address KMb creation for CALD groups. These methods range from original co-created KMb products with participatory frameworks (e.g. Wild et al., 2021<sup>5</sup>; Telenta et al., 2020<sup>10</sup>) to cultural adaptations of pre-existing KMb products.<sup>39</sup> Despite efforts to systematically develop or adapt KMb products,<sup>39, 47-49</sup> there is a wide range of cultural and linguistic adaptation processes.

Through this scoping review, we identified 24 studies that reported a variety of methods in adapting and developing KMb products for CALD communities. Across the various cultural communities, modes of information delivery, and approaches/processes cited, only five studies demonstrated deep structure cultural adaptation<sup>50</sup> and involved end-users in the highest level of stakeholder engagement (as per i2S model).<sup>12</sup>

Along with study characteristics and creation processes, we extracted information about the depth of creation or adaptation based on Resnicow's<sup>7</sup> explanation of surface and deep structures of cultural sensitivity. It has been reported that gaining deep structure cultural knowledge can be a time-consuming process, largely inaccessible to outsiders to the cultural community.<sup>51</sup> Although it was not possible to extract information about the cultural background of included studies team members, it is likely that researchers may not identify with the end-user population of study. Researchers who are outsiders to the end-user community lack the necessary information for deep structure cultural sensitivity on their own. However, engaging with community members directly can provide insider perspective for culturally sensitive practice.

Each phase of the i2S framework represents increasing involvement of end-users in research process;<sup>12</sup> with the ultimate stage of *Support* representing research decisions led by end-users. The relatively few studies that utilized all five levels of the i2S framework in this review potentially indicate the challenges and commitment required for this process. Studies that exemplified the *Support* phase of the i2S utilized end-user committees that were involved from early conversations about research priorities to eventual dissemination of findings. Ongoing stakeholder engagement is essential to gain insights for deep structure cultural aspects and relevant KMb.<sup>21</sup> The majority of studies included in this review engaged in some form of deep structure cultural adaptation, likely due in part to some form of stakeholder engagement consultation<sup>12</sup> reported in all included studies.

This emphasis on inductive knowledge obtainment and delivery mirrors processes outlined in CBPR<sup>52</sup> and PAR<sup>13</sup> frameworks. In both CBPR and PAR, the end-user from the community of study is positioned as a collaborator: someone who has autonomy in the research process as well as insider information for the community of study.<sup>13, 14, 52</sup> CBPR has been used as a guiding framework in health intervention literature, and may provide similar guidance for KMb product creation and adaptation.<sup>53</sup> Additionally, frameworks used for adapting health interventions, such as the Ecological Validity Model,<sup>16</sup> may also offer a systematic approach to cultural adaptations of KMb products. Regardless of the framework used, researchers who choose to develop or adapt KMb products for CALD communities may be well-supported by seeking deep structure cultural understandings through supportive, inductive stakeholder engagement.

A clear gap in the literature was around researchers' reflections of the processes used, as well as the method of KMb product evaluation. While many studies reported they evaluated the created or adapted KMb product for usability, only one study mentioned evaluating uptake and none assessed impact. Few studies reported the evaluation process or results, and none evaluated the engagement process with stakeholders. Additionally, many did not report on the practicality or feasibility of the processes used (time, resources, engagement), nor whether the product met end-users needed and expectations. Future research should aim to understand the practicalities and nuances of engaging end-users and evaluating the processes to support others in this field. Furthermore, greater transparency by researchers in their adaptation processes would aid in solidifying best practice considerations for culturally adapting KMb products. Ultimately, the most successful methods used by researchers to adapt or develop KMb products for CALD communities could be collated and used to form a framework for future works. This framework could then be evaluated with end-users from various cultural communities to assess its usefulness in this field. However, given how nuanced and tailored KMb should be in meeting the needs of the end-user, perhaps careful planning considering meaningful engagement and being intentional about the best methods to use is key.

### *Limitations*

This review only included publications in English, yet other cultural creation or adaptation methods studies may be present in languages other than English. The process of defining a KMb product was iterative and largely guided by consensus discussion. The overlap between KMb products and intervention materials was difficult to navigate, particularly when studies did not thoroughly describe their intervention materials.

### *Consultation*

By examining the methods others have used for their creation and adaptation work, a better understanding around the key considerations when developing or adapting KMb products for culturally and linguistically diverse communities can be achieved.

A methods working group (MWG) stemming from this work will be developed to drive the development of best practices for how to linguistically and culturally develop or adapt KMb products. The MWG will be made up of researchers, cultural knowledge brokers and community members who have firsthand experience and knowledge around how to engage with diverse communities as well as co-design KMb products. By critically evaluating current creation and adaptation practices, we intend to establish a core set of methods and considerations for creating or adapting healthcare decision-making tools for culturally and linguistically diverse communities.

## **Conclusion**

This review provides information on the various processes and levels of end-user engagement used to culturally develop or adapt a KMb product. While methods and processes, as well as theory or frameworks underpinning the work, varied across projects, it is clear that an important amount of time and resources is required. Significant gaps in the literature still remain surrounding how best to develop or adapt KMb products, what level of engagement is needed, as well as understanding the practicalities of culturally adapting KMb products. Until an appropriate framework exists, researchers would be well-supported by emphasizing cultural sensitivity and meaningful stakeholder engagement in their approaches.

The findings of this review and examples of cultural adaptation could be used to support the development of best practice guidelines for researchers working in this field. Understanding and developing considerations for best practices in this field will assist researchers and organizations in effectively reaching a wider population with health promotion and KMb initiatives.

## **Funding**

This work has been supported by funding from the Stollery Children's Hospital Foundation through the Stollery Science Lab. Dr. Hartling and Dr. Scott are Distinguished Researchers with the Stollery Science Lab supported by the Stollery Children's Hospital Foundation. Dr. Hartling is supported by a Canada Research Chair in Knowledge Synthesis and Translation. Dr. Scott is supported by a Canada Research Chair in Knowledge Translation in Child Health.

## **Acknowledgements**

We would like to thank Erica Wright for expertise in developing the ScR search strategy. We would also like to thank Sharon Parappally-Joseph, Samantha Cyrkot and Alex Melton for their assistance with screening and data extraction.

## **Author Comments**

A search update was run in July 2023. Title and Abstract screening is complete, and full text screening and data extraction are in progress. The updated manuscript will be submitted for peer review in a relevant Open Access Journal.

## References

1. Ward V. Why, Whose, What and How? A Framework for Knowledge Mobilisers. *Evid Policy*. 2017;13:477-97.
2. Straus SE, Tetroe J, Graham I. Defining knowledge translation. *CMAJ*. 2009;181(3-4):165-8.
3. Albrecht L, Scott SD, Hartling L. Knowledge translation tools for parents on child health topics: a scoping review. *BMC Health Serv Res*. 2017;17(1):1-12.
4. O'Brien J, Fossey E, Palmer VJ. A scoping review of the use of co-design methods with culturally and linguistically diverse communities to improve or adapt mental health services. *Health Soc Care Community*. 2021;29(1):1-17.
5. Wild A, Kunstler B, Goodwin D, Onyala S, Zhang L, Kufi M, et al. Communicating COVID-19 health information to culturally and linguistically diverse communities: insights from a participatory research collaboration. *Public Health Res Pract*. 2021;31(1).
6. Elliott SA, Wright KS, Scott SD, Hartling L. Perspectives From French and Filipino Parents on the Adaptation of Child Health Knowledge Translation Tools: Qualitative Exploration. *JMIR Formative Research*. 2022;6(3):e33156.
7. Resnicow K, Baranowski T, Ahluwalia JS, Braithwaite RL. Cultural sensitivity in public health: defined and demystified. *Ethn Dis*. 1999;9(1):10-21.
8. Durlak JA, DuPre EP. Implementation matters: A review of research on the influence of implementation on program outcomes and the factors affecting implementation. *Am J Community Psychol*. 2008;41(3):327-50.
9. O'Brien J, Fossey E, Palmer VJ. A scoping review of the use of co-design methods with culturally and linguistically diverse communities to improve or adapt mental health services. *Health Soc Care Community*. 2021;29(1):1-17.
10. Telenta J, Jones SC, Francis KL, Polonsky MJ, Beard J, Renzaho AMN. Australian lessons for developing and testing a culturally inclusive health promotion campaign. *Health Promot Int*. 2020;35(2):217-31.
11. Thomson MS, Chaze F, George U, Guruge S. Improving immigrant populations' access to mental health services in Canada: a review of barriers and recommendations. *J Immigr Minor Health*. 2015;17(6):1895-905.
12. Bammer G. Stakeholder engagement primer: 4. Options for engagement Integration and Implementation Insights2021 [Available from: <https://i2insights.org/2021/11/04/options-for-engagement/>].
13. Baum F, MacDougall C, Smith D. Participatory action research. *JECH*. 2006;60(10):854.
14. Wallerstein NB, Duran B. Using community-based participatory research to address health disparities. *Health Promot Pract*. 2006;7(3):312-23.
15. González Castro F, Garfinkle J. Critical issues in the development of culturally relevant substance abuse treatments for specific minority groups. *Alcoholism: Clinical and Experimental Research*. 2003;27(8):1381-8.
16. Bernal G, Bonilla J, Bellido C. Ecological validity and cultural sensitivity for outcome research: Issues for the cultural adaptation and development of psychosocial treatments with Hispanics. *J Abnorm Child Psychol*. 1995;23(1):67-82.



17. Arksey H, O'Malley L. Scoping studies: towards a methodological framework. *Int J Soc Res Methodol*. 2005;8(1):19-32.
18. Levac D, Colquhoun H, O'Brien KK. Scoping studies: advancing the methodology. *Implement Sci*. 2010;5:69-.
19. Tricco AC, Lillie E, Zarin W, O'Brien KK, Colquhoun H, Levac D, et al. PRISMA extension for scoping reviews (PRISMA-ScR): checklist and explanation. *Ann Intern Med*. 2018;169(7):467-73.
20. Erlingsson C, Brysiewicz P. A hands-on guide to doing content analysis. *Afr J Emerg Med*. 2017;7(3):93-9.
21. Wilson BD, Miller RL. Examining strategies for culturally grounded HIV prevention: a review. *AIDS Educ Prev*. 2003;15(2):184-202.
22. Participation IAfP. Public participation spectrum 2004 [updated Retrieved October 2021 from. Available from: [https://iap2canada.ca/Resources/Documents/0702-Foundations-Spectrum-MW-rev2%20\(1\).pdf](https://iap2canada.ca/Resources/Documents/0702-Foundations-Spectrum-MW-rev2%20(1).pdf).
23. McNeill M, Noyek S, Engeda E, Fayed N. Assessing the engagement of children and families in selecting patient-reported outcomes (PROs) and developing their measures: a systematic review. *Qual Life Res*. 2021;30(4):983-95.
24. Ali PA, Salway S, Such E, Dearden A, Willox M. Enhancing health literacy through co-design: development of culturally appropriate materials on genetic risk and customary consanguineous marriage. *Prim Health Care Res Dev*. 2019;20.
25. Hempler NF, Nacic S, Ewers B, Willaing I. Dietary education must fit into everyday life: a qualitative study of people with a Pakistani background and type 2 diabetes. *Patient Prefer Adherence*. 2015;9:347.
26. Best AL. Speaking to the spirit: Examining the effectiveness of spiritually-framed breast cancer screening messages among African American women. *Dissertation Abstracts International: Section B: The Sciences and Engineering*. 2013;74(6-B(E)):No-Specified.
27. Arnold CM, Aragon D, Shephard J, Van Sell SL. The coming of the blessing: A successful cross-cultural collaborative effort for American Indian/Alaska Native families. *Special Issue: Issues related to the health of American Indians and Alaska Natives*. 2011;34(3):196-201.
28. Hashim MJ, Mustafa H, Al Abdouli AO, Abdulla Al RA, AlQahtani SM, Almajed SA, et al. Health education materials for Arab patients: content and design preferences. *Medical principles and practice : international journal of the Kuwait University, Health Science Centre*. 2013;22(4):411-4.
29. Drago MJ, Guillén U, Schiaratura M, Batza J, Zygmunt A, Mowes A, et al. Constructing a Culturally Informed Spanish Decision-Aid to Counsel Latino Parents Facing Imminent Extreme Premature Delivery. *Matern Child Health J*. 2018;22(7):950-7.
30. Grasaas E, Fegran L, Helseth S, Stinson J, Martinez S, Lalloo C, Haraldstad K. iCanCope With Pain: Cultural Adaptation and Usability Testing of a Self-Management App for Adolescents With Persistent Pain in Norway. *JMIR Research Protocols*. 2019;8(6):e12940.
31. Grinker RR, Kang-Yi CD, Ahmann C, Beidas RS, Lagman A, Mandell DS. Cultural Adaptation and Translation of Outreach Materials on Autism Spectrum Disorder. *Journal of autism and developmental disorders*. 2015;45(8):2329-36.
32. Mathieson F, Mihaere K, Collings S, Dowell A, Stanley J. Maori cultural adaptation of a brief mental health intervention in primary care. *J Prim Health Care*. 2012;4(3):231-8.



33. Bilbrey AC, Humber MB, Plowey ED, Garcia I, Chennapragada L, Desai K, et al. The Impact of Latino Values and Cultural Beliefs on Brain Donation: Results of a Pilot Study to Develop Culturally Appropriate Materials and Methods to Increase Rates of Brain Donation in this Under-Studied Patient Group. *Clinical gerontologist*. 2018;41(3):237-48.
34. Guttman N, Gesser-Edelsburg A, Aycheh S. Communicating health rights to disadvantaged populations: challenges in developing a culture-centered approach for Ethiopian immigrants in Israel. *Health Communication*. 2013;28(6):546-56.
35. Gordon EJ, Feinglass J, Carney P, Ramirez D, Olivero M, O'Connor K, et al. An interactive, bilingual, culturally targeted website about living kidney donation and transplantation for hispanics: development and formative evaluation. *JMIR Res Protoc*. 2015;4(2):e42.
36. Li W-W, Leung C. Development and pilot test of a culturally sensitive CD-ROM for hypertensive, older Chinese immigrants. *Computers, informatics, nursing : CIN*. 2012;30(4):190-5.
37. Abbass-Dick J, Brolly M, Huizinga J, Newport A, Xie F, George S, Sterken E. Designing an eHealth Breastfeeding Resource With Indigenous Families Using a Participatory Design. *J Transcult Nurs*. 2018;29(5):480-8.
38. Baptista S, Heleno B, Pinto M, Guimaraes B, China D, Ramos JP, et al. Translation and cultural adaptation of a prostate cancer screening decision aid: a qualitative study in Portugal. *BMJ Open*. 2020;10(3):e034384.
39. Meherali S, Hartling L, Scott SD. Cultural Adaptation of Digital Knowledge Translation Tools for Acute Otitis Media in Low- to Middle-Income Countries: Mixed Methods Usability Study. *JMIR Form Res*. 2021;5(1):e13908.
40. Rami H, Hussien H, Rabie M, Sabry W, Missiry ME, Ghamry RE. Evaluating the effectiveness of a culturally adapted behavioral family psycho-educational program for Egyptian patients with schizophrenia. *Transcultural Psychiatry*. 2018;55(5):601-22.
41. Sharpe PA, Brandt HM, McCree DH, Owl-Myers E, Taylor B, Mullins G. Development of culturally tailored educational brochures on HPV and pap tests for American Indian women. *J Transcult Nurs*. 2013;24(3):282-90.
42. Harvey I, O'Brien M. Addressing health disparities through patient education: the development of culturally-tailored health education materials at Puentes de Salud. *J Community Health Nurs*. 2011;28(4):181-9.
43. Norris AE, Thalasin RD, Hecht ML. Multicultural Adaptation of Mighty Girls for Widespread Dissemination: Pilot Study, App Development and Usability Testing, and Gauging Parent Support With Focus Groups. *JMIR Form Res*. 2021;5(6):e24937.
44. Stanley LR, Kelly KJ, Swaim RC, Jackman D. Cultural Adaptation of the Be under Your Own Influence Media Campaign for Middle-School American Indian Youth. *J Health Commun*. 2018;23(12):1017-25.
45. van der Steen JT, Hertogh CPM, de Graas T, Nakanishi M, Toscani F, Arcand M. Translation and cross-cultural adaptation of a family booklet on comfort care in dementia: sensitive topics revised before implementation. *J Med Ethics*. 2013;39(2):104-9.
46. Van Son CR. Developing Culturally Targeted Diabetes Educational Materials for Older Russian-Speaking Immigrants. *The Diabetes educator*. 2014;40(4):418-26.
47. Elliott SA, Wright KS, Scott SD, Hartling L. Perspectives From French and Filipino Parents on the Adaptation of Child Health Knowledge Translation Tools: Qualitative Exploration. *JMIR Form Res*. 2022;6(3):e33156.

48. Elliott SA, Wright KS, Scott SD, Mohamed M, Farah A, Hartling L. Adapting Child Health Knowledge Translation Tools for Somali Parents: Qualitative Study Exploring Process Considerations and Stakeholder Engagement. *JMIR Form Res.* 2022;6(4):e36354.
49. Elliott SA, Kreutz J, Wright KS, Di Lallo S, Scott SD, L. H. Adapting Child Health Knowledge Translation Tools for Indigenous Communities: A Qualitative Exploration of Indigenous Healthcare Provider Perspectives. *JMIR Form Res.* 2022;Under Review.
50. Lefebvre RC. *Social marketing and social change: Strategies and tools for improving health, well-being, and the environment*: John Wiley & Sons; 2013.
51. Collins PH. Learning from the outsider within: The sociological significance of Black feminist thought. *Social Problems.* 1986;33(6):s14-s32.
52. Wallerstein N, Duran B. Community-based participatory research contributions to intervention research: the intersection of science and practice to improve health equity. *Am J Public Health.* 2010;100(S1):S40-S6.
53. Salimi Y, Shahandeh K, Malekafzali H, Loori N, Kheiltash A, Jamshidi E, et al. Is community-based participatory research (CBPR) useful? A systematic review on papers in a decade. *Int J Prev Med.* 2012;3(6):386.
54. Minkler M, Wallerstein N. *Community-based participatory research for health: From process to outcomes*: John Wiley & Sons; 2011.
55. Bowen D, Hyams T, Goodman M, West K, Harris-Wai J, Yu JH. Systematic review of quantitative measures of stakeholder engagement. *Clin Transl Sci.* 2017;10(5):314.
56. Das A, Svanæs D. Human-centred methods in the design of an e-health solution for patients undergoing weight loss treatment. *Int J Med Inform.* 2013;82(11):1075-91.
57. Morrison C, Dearden A. Beyond tokenistic participation: using representational artefacts to enable meaningful public participation in health service design. *Health Policy.* 2013;112(3):179-86.
58. Prevention ECfD, Control. *Translation is not enough—cultural adaptation of health communication materials*. ECDC Stockholm; 2016.
59. Entman RM. Framing: Towards clarification of a fractured paradigm. *McQuail's reader in mass communication theory.* 1993;390:397.
60. Holt CL. Religiosity, spirituality, and the design of health communication message and interventions. *Health communication message design: Theory and practice.* 2012:153-64.
61. Gagne R BL, Wager W. *Principles of Instructional Design.* 4 ed. Orlando, FL: Harcourt Brace Jovanovich; 1992.
62. A. B. *Social Foundations of Thought and Action: A Social Cognitive Theory.* Englewood Cliffs, NJ: Prentice-Hall; 1986.
63. Wild D, Grove A, Martin M, Eremenco S, McElroy S, Verjee-Lorenz A, Erikson P. Principles of good practice for the translation and cultural adaptation process for patient-reported outcomes (PRO) measures: report of the ISPOR task force for translation and cultural adaptation. *Value in Health.* 2005;8(2):94-104.
64. Weller SC. Cultural consensus theory: Applications and frequently asked questions. *Field methods.* 2007;19(4):339-68.
65. Green L, Kreuter M. *The precede–proceed model. Health promotion planning: an educational approach* 3rd ed Mountain View (CA): Mayfield Publishing Company. 1999:32-43.

66. Bernal G, Jiménez-Chafey MI, Domenech Rodríguez MM. Cultural adaptation of treatments: A resource for considering culture in evidence-based practice. *Prof Psychol Res Pr.* 2009;40(4):361.

**Table 1: Characteristics of studies culturally creating or adapting KMb products**

| Study Characteristics        |                                                                                                                                         |                                                                                                                                                                                                       | Population Characteristics                     |                                                                                                                    | KT Product Characteristics                                                                                                                 |                         |
|------------------------------|-----------------------------------------------------------------------------------------------------------------------------------------|-------------------------------------------------------------------------------------------------------------------------------------------------------------------------------------------------------|------------------------------------------------|--------------------------------------------------------------------------------------------------------------------|--------------------------------------------------------------------------------------------------------------------------------------------|-------------------------|
| Author<br>Year<br>Country    | Study design /<br>methods<br>Sample size                                                                                                | Objective and setting                                                                                                                                                                                 | Age,<br>mean±SD<br>(range)*<br>Males, n<br>(%) | Primary<br>language<br>Race<br>Condition                                                                           | KT product<br>description and format                                                                                                       | Target<br>end-<br>users |
| Abbas-Dick<br>2018<br>Canada | <ul style="list-style-type: none"> <li>• Qualitative</li> <li>• Participatory research with content analysis</li> <li>• N=11</li> </ul> | To work in partnership with Indigenous communities to create an eHealth breastfeeding resource for Indigenous families                                                                                | 31 (18-57)<br>0 (0)                            | <ul style="list-style-type: none"> <li>• English</li> <li>• Indigenous</li> <li>• Breastfeeding</li> </ul>         | Online breastfeeding co-parenting resources including text, video, games, quizzes, and links to internet resources.                        | Public (families)       |
| Ali<br>2018<br>UK            | <ul style="list-style-type: none"> <li>• Qualitative</li> <li>• Interviews</li> <li>• N=20</li> </ul>                                   | To develop a simple health literacy intervention aimed at supporting informed reproductive choice among members of UK communities practicing customary consanguineous marriage                        | NR<br>NR                                       | <ul style="list-style-type: none"> <li>• Urdu</li> <li>• South Asian</li> <li>• Consanguineous marriage</li> </ul> | Simple health literacy leaflet on reproductive choices.                                                                                    | Public                  |
| Arnold<br>2011<br>USA        | <ul style="list-style-type: none"> <li>• Qualitative</li> <li>• Focus groups</li> <li>• N=13</li> </ul>                                 | To describe how the desire of an American Indian community in Wyoming grew into an American Indian/Alaska Native women’s advisory committee, a culturally appropriate prenatal education booklet, and | NR<br>NR                                       | <ul style="list-style-type: none"> <li>• Various</li> <li>• Indigenous</li> <li>• Prenatal education</li> </ul>    | A comprehensive prenatal booklet that would “tell the story of the way to have a healthy pregnancy.” Presented in a conversational format. | Parents                 |

| Study Characteristics        |                                                                                                                             |                                                                                                                                                                                                                                                                                                                   | Population Characteristics                     |                                                                                                                            | KT Product Characteristics                                               |                         |
|------------------------------|-----------------------------------------------------------------------------------------------------------------------------|-------------------------------------------------------------------------------------------------------------------------------------------------------------------------------------------------------------------------------------------------------------------------------------------------------------------|------------------------------------------------|----------------------------------------------------------------------------------------------------------------------------|--------------------------------------------------------------------------|-------------------------|
| Author<br>Year<br>Country    | Study design /<br>methods<br>Sample size                                                                                    | Objective and setting                                                                                                                                                                                                                                                                                             | Age,<br>mean±SD<br>(range)*<br>Males, n<br>(%) | Primary<br>language<br>Race<br>Condition                                                                                   | KT product<br>description and format                                     | Target<br>end-<br>users |
|                              |                                                                                                                             | a national initiative for a non-profit organization                                                                                                                                                                                                                                                               |                                                |                                                                                                                            |                                                                          |                         |
| Baptista<br>2020<br>Portugal | <ul style="list-style-type: none"> <li>• Qualitative</li> <li>• Interviews</li> <li>• N=15</li> </ul>                       | To translate and culturally adapt an English language patient decision aid addressing prostate cancer screening, so it can be used by Portuguese men.                                                                                                                                                             | 61±4.9 (55-69)<br>15 (100)                     | <ul style="list-style-type: none"> <li>• Portuguese</li> <li>• White</li> <li>• Prostate cancer</li> </ul>                 | Prostate cancer screening text-based decision aid.                       | Patients                |
| Best<br>2012<br>USA          | <ul style="list-style-type: none"> <li>• Mixed methods</li> <li>• Focus groups, interviews, RCT</li> <li>• N=200</li> </ul> | To work with a group of African American women to 1) identify important spiritual elements to be included in health communication materials, and develop a spiritually-framed Breast Cancer Screening (BCS) message in response to their feedback and 2) evaluate the effectiveness of the spiritually-framed BCS | 48.9±15.4 (25-88)<br>0 (0)                     | <ul style="list-style-type: none"> <li>• English</li> <li>• African American</li> <li>• Breast cancer screening</li> </ul> | Print and radio-based messaging for breast cancer screening information. | Patients                |

| Study Characteristics     |                                                                                                                         |                                                                                                                                                                                                     | Population Characteristics                     |                                                                                                          | KT Product Characteristics                                                  |                         |
|---------------------------|-------------------------------------------------------------------------------------------------------------------------|-----------------------------------------------------------------------------------------------------------------------------------------------------------------------------------------------------|------------------------------------------------|----------------------------------------------------------------------------------------------------------|-----------------------------------------------------------------------------|-------------------------|
| Author<br>Year<br>Country | Study design /<br>methods<br>Sample size                                                                                | Objective and setting                                                                                                                                                                               | Age,<br>mean±SD<br>(range)*<br>Males, n<br>(%) | Primary<br>language<br>Race<br>Condition                                                                 | KT product<br>description and format                                        | Target<br>end-<br>users |
|                           |                                                                                                                         | message compared to a more traditional BCS message among African American women using a cognitive response analysis                                                                                 |                                                |                                                                                                          |                                                                             |                         |
| Bilbrey<br>2018<br>USA    | <ul style="list-style-type: none"> <li>• Mixed methods</li> <li>• Focus groups, online surveys</li> <li>• NR</li> </ul> | To develop materials which help answer questions and support the decision-making process for families related to brain donation                                                                     | NR<br>NR                                       | <ul style="list-style-type: none"> <li>• Spanish</li> <li>• Latino</li> <li>• Brain donation</li> </ul>  | Bilingual brochure highlighting the benefits and process of brain donation. | Patients (families)     |
| Drago<br>2018<br>USA      | <ul style="list-style-type: none"> <li>• Qualitative</li> <li>• Interviews</li> <li>• N=22</li> </ul>                   | To characterize Latino parental perceptions of antenatal counseling in order to construct and validate a Spanish decision-aid to improve parental knowledge of prematurity after antenatal consults | NR<br>3 (14)                                   | <ul style="list-style-type: none"> <li>• Spanish</li> <li>• Latino</li> <li>• Premature birth</li> </ul> | Card-based English decision-aid for parents experiencing premature birth.   | Patients                |
| Gordon<br>2015<br>USA     | <ul style="list-style-type: none"> <li>• Qualitative</li> <li>• Focus groups</li> <li>• N=76</li> </ul>                 | To describe the community engagement                                                                                                                                                                | NR<br>NR                                       | <ul style="list-style-type: none"> <li>• Spanish</li> <li>• Latino</li> </ul>                            | Website on routine transplant education.                                    | Patients                |

| Study Characteristics     |                                                                                                       |                                                                                                                                                                                                                    | Population Characteristics                     |                                                                                                                      | KT Product Characteristics                                                           |                         |
|---------------------------|-------------------------------------------------------------------------------------------------------|--------------------------------------------------------------------------------------------------------------------------------------------------------------------------------------------------------------------|------------------------------------------------|----------------------------------------------------------------------------------------------------------------------|--------------------------------------------------------------------------------------|-------------------------|
| Author<br>Year<br>Country | Study design /<br>methods<br>Sample size                                                              | Objective and setting                                                                                                                                                                                              | Age,<br>mean±SD<br>(range)*<br>Males, n<br>(%) | Primary<br>language<br>Race<br>Condition                                                                             | KT product<br>description and format                                                 | Target<br>end-<br>users |
|                           |                                                                                                       | processes and data collection efforts used to identify culturally appropriate content and describe development of website content and design, and usability testing.                                               |                                                | <ul style="list-style-type: none"> <li>• Kidney donation and transplantation</li> </ul>                              |                                                                                      |                         |
| Grasaas<br>2019<br>Norway | <ul style="list-style-type: none"> <li>• Qualitative</li> <li>• Interviews</li> <li>• N=11</li> </ul> | To describe the translation and cultural adaptation of the iCanCope with Pain mobile app into the Norwegian context and evaluate the app's usability using a phased approach at the University of Agder laboratory | NR (16-18)<br>NR                               | <ul style="list-style-type: none"> <li>• Norwegian</li> <li>• White</li> <li>• Adolescent pain</li> </ul>            | Mobile app containing resources for current best practices for pain self-management. | Patients                |
| Grinker<br>2015<br>USA    | <ul style="list-style-type: none"> <li>• Qualitative</li> <li>• Interviews</li> <li>• N=23</li> </ul> | To describe a methodology for translating outreach materials for Autism Spectrum Disorder using the Autism Speaks First 100 Days Kit as an exemplar.                                                               | NR<br>NR                                       | <ul style="list-style-type: none"> <li>• Korean</li> <li>• East Asian</li> <li>• Autism spectrum disorder</li> </ul> | Autism Speaks First 100 Days Kit: text document.                                     | Patients (families)     |

| Study Characteristics     |                                                                                                                   |                                                                                                                                                                                       | Population Characteristics                     |                                                                                                                                                          | KT Product Characteristics                                                                                                                                                                           |                         |
|---------------------------|-------------------------------------------------------------------------------------------------------------------|---------------------------------------------------------------------------------------------------------------------------------------------------------------------------------------|------------------------------------------------|----------------------------------------------------------------------------------------------------------------------------------------------------------|------------------------------------------------------------------------------------------------------------------------------------------------------------------------------------------------------|-------------------------|
| Author<br>Year<br>Country | Study design /<br>methods<br>Sample size                                                                          | Objective and setting                                                                                                                                                                 | Age,<br>mean±SD<br>(range)*<br>Males, n<br>(%) | Primary<br>language<br>Race<br>Condition                                                                                                                 | KT product<br>description and format                                                                                                                                                                 | Target<br>end-<br>users |
| Guttman<br>2013<br>Israel | <ul style="list-style-type: none"> <li>• Qualitative</li> <li>• Interviews</li> <li>• N=104</li> </ul>            | To develop and present health rights information materials for a disadvantaged cultural minority, the Ethiopian immigrant community in Israel.                                        | NR (NR)<br>44 (42)                             | <ul style="list-style-type: none"> <li>• English</li> <li>• Middle Eastern/North African</li> <li>• Health rights information</li> </ul>                 | Two styles of video: 1 video with a humorous storyline format, and 2 videos with a narrator relaying serious information. Two styles of print materials: a photonovella, and an illustrated booklet. | Public                  |
| Harvey<br>2011<br>USA     | <ul style="list-style-type: none"> <li>• Qualitative</li> <li>• Interviews</li> <li>• N=20</li> </ul>             | To develop, produce and disseminate culturally and linguistically appropriate health brochures in community health center serving populations of low health literacy, in Philadelphia | NR (20-60)<br>NR                               | <ul style="list-style-type: none"> <li>• Spanish</li> <li>• Latinx</li> <li>• Health information topics</li> </ul>                                       | Written health brochures on common health information to promote health literacy.                                                                                                                    | Public                  |
| Hashim<br>2013<br>UAE     | <ul style="list-style-type: none"> <li>• Mixed methods</li> <li>• Focus groups, survey</li> <li>• N=17</li> </ul> | To investigate the content and design preferences of printed health education leaflets among Arabic communities, conducted in clinic                                                  | 47.4±14.3<br>(17-70)<br>9 (53)                 | <ul style="list-style-type: none"> <li>• Arabic</li> <li>• Middle Eastern/North African</li> <li>• Preferences for health education materials</li> </ul> | Diabetes health education materials in a trifold brochure.                                                                                                                                           | Public                  |



| Study Characteristics      |                                                                                                                           |                                                                                                                                                                                                                                                                       | Population Characteristics                     |                                                                                                               | KT Product Characteristics                                                       |                         |
|----------------------------|---------------------------------------------------------------------------------------------------------------------------|-----------------------------------------------------------------------------------------------------------------------------------------------------------------------------------------------------------------------------------------------------------------------|------------------------------------------------|---------------------------------------------------------------------------------------------------------------|----------------------------------------------------------------------------------|-------------------------|
| Author<br>Year<br>Country  | Study design /<br>methods<br>Sample size                                                                                  | Objective and setting                                                                                                                                                                                                                                                 | Age,<br>mean±SD<br>(range)*<br>Males, n<br>(%) | Primary<br>language<br>Race<br>Condition                                                                      | KT product<br>description and format                                             | Target<br>end-<br>users |
|                            |                                                                                                                           | waiting areas at public hospital                                                                                                                                                                                                                                      |                                                |                                                                                                               |                                                                                  |                         |
| Hempler<br>2015<br>Denmark | <ul style="list-style-type: none"> <li>• Qualitative</li> <li>• Design-based research approach</li> <li>• N=18</li> </ul> | To develop culturally sensitive dialog tools to support person-centered dietary education targeting Pakistani immigrants in Denmark with type 2 diabetes                                                                                                              | NR<br>NR                                       | <ul style="list-style-type: none"> <li>• English</li> <li>• South Asian</li> <li>• Type 2 diabetes</li> </ul> | Diabetes dialog tools including interactive engagement, online videos, and text. | Patients                |
| Lee<br>2019<br>USA         | <ul style="list-style-type: none"> <li>• Qualitative</li> <li>• Focus groups</li> <li>• N=20</li> </ul>                   | To demonstrate how a culturally targeted and tailored mobile text messaging intervention, mobile screening (mScreening), was developed to promote the uptake of Papanicolaou tests and human papillomavirus vaccine (HPV) among young Korean American immigrant women | 26 (21-29)<br>0 (0)                            | <ul style="list-style-type: none"> <li>• Korean</li> <li>• East Asian</li> <li>• Cervical cancer</li> </ul>   | HPV mScreening mobile app.                                                       | Public                  |
| Li<br>2012<br>USA          | <ul style="list-style-type: none"> <li>• Qualitative</li> <li>• Interviews</li> <li>• N=5</li> </ul>                      | To develop, pilot test and evaluate an innovative, culturally                                                                                                                                                                                                         | 74.3±4.8<br>(71-81)<br>4 (20)                  | <ul style="list-style-type: none"> <li>• Mandarin</li> <li>• East Asian</li> <li>• Hypertension</li> </ul>    | Hypertension CD-ROM including visual aids and audio features.                    | Patients                |

| Study Characteristics            |                                                                                                                    |                                                                                                                                                                                                                          | Population Characteristics                     |                                                                                                                                      | KT Product Characteristics                                       |                         |
|----------------------------------|--------------------------------------------------------------------------------------------------------------------|--------------------------------------------------------------------------------------------------------------------------------------------------------------------------------------------------------------------------|------------------------------------------------|--------------------------------------------------------------------------------------------------------------------------------------|------------------------------------------------------------------|-------------------------|
| Author<br>Year<br>Country        | Study design /<br>methods<br>Sample size                                                                           | Objective and setting                                                                                                                                                                                                    | Age,<br>mean±SD<br>(range)*<br>Males, n<br>(%) | Primary<br>language<br>Race<br>Condition                                                                                             | KT product<br>description and format                             | Target<br>end-<br>users |
|                                  |                                                                                                                    | relevant CD-ROM with a focus on hypertension education and management, directed at the older Chinese immigrant population, at Asian health clinics in San Francisco                                                      |                                                |                                                                                                                                      |                                                                  |                         |
| Mathieson<br>2012<br>New Zealand | <ul style="list-style-type: none"> <li>• Qualitative</li> <li>• Interviews</li> <li>• N=16</li> </ul>              | To adapt an existing cognitive behavioural therapy-based, guided self-management intervention for near-threshold mental health syndromes in primary care, for Maori, and to examine its acceptability and effectiveness. | 38.9 (20-65)<br>9 (19)                         | <ul style="list-style-type: none"> <li>• te reo (Maori language)</li> <li>• Indigenous</li> <li>• Mental health syndromes</li> </ul> | Self-management booklets on relevant mental health issues.       | Patients                |
| Meherali<br>2021<br>Canada       | <ul style="list-style-type: none"> <li>• Mixed methods</li> <li>• Focus groups, surveys</li> <li>• N=68</li> </ul> | To (1) develop Acute Otitis Media KT tools for Canadian parents, (2) adapt the KT tools across cultural contexts, and (3) evaluate the usability of the adapted KT tools.                                                | NR (0-50)<br>4 (6)                             | <ul style="list-style-type: none"> <li>• Urdu</li> <li>• South Asian</li> <li>• Acute otitis media</li> </ul>                        | Digital arts-based KT tools on how to manage acute otitis media. | Parents                 |

| Study Characteristics     |                                                                                                         |                                                                                                                                                                                          | Population Characteristics                     |                                                                                                                              | KT Product Characteristics                                                                                                                             |                         |
|---------------------------|---------------------------------------------------------------------------------------------------------|------------------------------------------------------------------------------------------------------------------------------------------------------------------------------------------|------------------------------------------------|------------------------------------------------------------------------------------------------------------------------------|--------------------------------------------------------------------------------------------------------------------------------------------------------|-------------------------|
| Author<br>Year<br>Country | Study design /<br>methods<br>Sample size                                                                | Objective and setting                                                                                                                                                                    | Age,<br>mean±SD<br>(range)*<br>Males, n<br>(%) | Primary<br>language<br>Race<br>Condition                                                                                     | KT product<br>description and format                                                                                                                   | Target<br>end-<br>users |
| Norris<br>2021<br>USA     | <ul style="list-style-type: none"> <li>• Qualitative</li> <li>• Focus groups</li> <li>• N=25</li> </ul> | To create a multicultural adaptation of the Mighty Girls program using a mobile app that is less costly to disseminate and is acceptable to parents of 7 <sup>th</sup> grade girls       | NR (10-14)<br>0 (0)                            | <ul style="list-style-type: none"> <li>• English</li> <li>• Latinx</li> <li>• Sexual health</li> </ul>                       | A narrative-generating app to support sexual health behavior change.                                                                                   | Patients<br>(families)  |
| Rami<br>2018<br>Egypt     | <ul style="list-style-type: none"> <li>• Quantitative</li> <li>• RCT</li> <li>• N=20</li> </ul>         | To translate and culturally adapt the Behavioral Family Psycho-Education Program and conduct a preliminary efficacy evaluation for outpatients suffering from schizophrenia              | NR (18-65)<br>NR                               | <ul style="list-style-type: none"> <li>• Arabic</li> <li>• Middle Eastern/North African</li> </ul>                           | Informational leaflets about schizophrenia, high emotionally expressive families, and training materials for communication and problem-solving skills. | Patients<br>(families)  |
| Sharpe<br>2013<br>USA     | <ul style="list-style-type: none"> <li>• Qualitative</li> <li>• Interviews</li> <li>• N=32</li> </ul>   | To describe the process and application of formative assessment with women attending an American Indian women's clinic to the development and pretesting a culturally tailored brochure. | 41 (20-61)<br>0 (0)                            | <ul style="list-style-type: none"> <li>• English</li> <li>• Indigenous</li> <li>• Women with human papillomavirus</li> </ul> | Informational brochure with the HPV vaccine recommendations, its availability, and accessibility.                                                      | Patients                |

| Study Characteristics           |                                                                                                                                    |                                                                                                                                                                                                                                             | Population Characteristics                     |                                                                                                                                 | KT Product Characteristics                                                            |                         |
|---------------------------------|------------------------------------------------------------------------------------------------------------------------------------|---------------------------------------------------------------------------------------------------------------------------------------------------------------------------------------------------------------------------------------------|------------------------------------------------|---------------------------------------------------------------------------------------------------------------------------------|---------------------------------------------------------------------------------------|-------------------------|
| Author<br>Year<br>Country       | Study design /<br>methods<br>Sample size                                                                                           | Objective and setting                                                                                                                                                                                                                       | Age,<br>mean±SD<br>(range)*<br>Males, n<br>(%) | Primary<br>language<br>Race<br>Condition                                                                                        | KT product<br>description and format                                                  | Target<br>end-<br>users |
| Stanley<br>2018<br>USA          | <ul style="list-style-type: none"> <li>• Qualitative</li> <li>• Focus groups</li> <li>• N=24</li> </ul>                            | To describe formative research undertaken to guide adaptation for AI youth of a prevention intervention, Be Under Your Own Influence (BUYOI), previously found to be effective in reducing substance use among middle-school youth.         | NR<br>NR                                       | <ul style="list-style-type: none"> <li>• English</li> <li>• Indigenous</li> <li>• Substance use</li> </ul>                      | BUYOI paper-based messages, targeted to middle-school youth.                          | Public                  |
| van der Steen<br>2013<br>Canada | <ul style="list-style-type: none"> <li>• Qualitative</li> <li>• Content analysis of transcribed materials</li> <li>• NR</li> </ul> | To develop a decision-making booklet on palliative care issues. To understand which aspects are sensitive from an ethical and cultural point of view within the respective cultural contexts in giving shape to palliative care in dementia | NR<br>NR                                       | <ul style="list-style-type: none"> <li>• Dutch, Japanese and Italian</li> <li>• White/East Asian</li> <li>• Dementia</li> </ul> | A booklet on comfort care at the end of life with dementia.                           | Patients (families)     |
| Van Son<br>2014<br>USA          | <ul style="list-style-type: none"> <li>• Qualitative</li> <li>• Interviews</li> <li>• N=10</li> </ul>                              | To describe a project in which culturally targeted diabetes education materials for                                                                                                                                                         | NR (over 65)<br>NR                             | <ul style="list-style-type: none"> <li>• Russian</li> <li>• White</li> <li>• Diabetes</li> </ul>                                | 12 educational documents created with Russian on one side and English on the other to | Patients                |

| Study Characteristics     |                                          |                                                                                              | Population Characteristics                     |                                          | KT Product Characteristics                                         |                         |
|---------------------------|------------------------------------------|----------------------------------------------------------------------------------------------|------------------------------------------------|------------------------------------------|--------------------------------------------------------------------|-------------------------|
| Author<br>Year<br>Country | Study design /<br>methods<br>Sample size | Objective and setting                                                                        | Age,<br>mean±SD<br>(range)*<br>Males, n<br>(%) | Primary<br>language<br>Race<br>Condition | KT product<br>description and format                               | Target<br>end-<br>users |
|                           |                                          | older Russian-speaking immigrants were designed and developed, delivered at diabetes clinics |                                                |                                          | support patients make better health decision with regards to food. |                         |

\* age in years. Kmb, knowledge translation; UK, United Kingdom; RCT, randomized controlled trial

**Table 2: Processes of creating or adapting of KMb products**

| Study                        | KT Product Creation/Adaptation Process                                                                                                                                                                                                                                                                                                                                                                                                                                                                                                                                                                                                                                                                                                                                                                                                                                                                                                                                                                                                                                         |
|------------------------------|--------------------------------------------------------------------------------------------------------------------------------------------------------------------------------------------------------------------------------------------------------------------------------------------------------------------------------------------------------------------------------------------------------------------------------------------------------------------------------------------------------------------------------------------------------------------------------------------------------------------------------------------------------------------------------------------------------------------------------------------------------------------------------------------------------------------------------------------------------------------------------------------------------------------------------------------------------------------------------------------------------------------------------------------------------------------------------|
| Abbas-Dick<br>2018<br>Canada | <p><u>Product creation</u>: development of a new KT product (eHealth resource for Indigenous families created)</p> <p><u>Literature/product search</u>: compiled generic resources on breastfeeding</p> <p><u>Stakeholder engagement</u>: Indigenous mothers and committee members reviewed generic resources and provided feedback for culturally relevant resources; interviews used to gather feedback from mothers</p> <p><u>Resources utilized</u>: committee members and health care professionals (health care providers were involved in providing breastfeeding education/support), lactation consultant, education specialist, website developer, graphic designer, animator</p> <p><u>Evaluation</u>: mothers from development phase, advisory members, additional mothers recruited for resource feedback</p>                                                                                                                                                                                                                                                      |
| Ali<br>2018<br>UK            | <p><u>Product creation</u>: development of a new KT product (health literacy leaflet)</p> <p><u>Literature/product search</u>: preparatory work involved developing networks with community organizations</p> <p><u>Stakeholder engagement</u>: semi-structured interviews and focus groups with men and women from community; four participatory workshops (one mixed sex and three single sex) attended by 8–14 participants with some participants carrying on from the first round; group exploration of alternative potential content and formats for resource vignette-led community level group discussions on wider social context; prototype leaflet development; fine-grained piloting and refinement; Local rollout: printing and companion audio/video clips</p> <p><u>Resources utilized</u>: multi-lingual nurse researcher, a public health researcher, two designers with expertise in participatory design, an anthropologist, a product designer and a multilingual research assistant, community organizations and leaders</p> <p><u>Evaluation</u>: NR</p> |
| Arnold<br>2011<br>USA        | <p><u>Product creation</u>: development of a new KT product (booklet using the concept of the medicine wheel)</p> <p><u>Literature/product search</u>: NR</p> <p><u>Stakeholder engagement</u>: investigators started by building a trusting relationship with women from reservations and those attending health conferences; approached them to join volunteer committee; committee consisted of 13 volunteers, staff and volunteer faculty members; women were encouraged to conduct focus groups on their respective reservations with other moms and health care providers</p> <p><u>Resources utilized</u>: American Indian/Alaska Native graphic artist</p> <p><u>Evaluation</u>: survey distributed with booklet in clinics</p>                                                                                                                                                                                                                                                                                                                                        |
| Baptista<br>2020<br>Portugal | <p><u>Product creation</u>: adaptation of existing KT product (decision aid for prostate cancer screening)</p> <p><u>Literature/product search</u>: searched for prostate cancer screening decision aids from the Ottawa Hospital Research Institute; applicable decision aids were critically appraised; we selected the ‘Making the Best Choice’</p>                                                                                                                                                                                                                                                                                                                                                                                                                                                                                                                                                                                                                                                                                                                         |

|                        |                                                                                                                                                                                                                                                                                                                                                                                                                                                                                                                                                                                                                                                                                                                                                                                                                                                                                                                                                                                                                                                                                                                                                                                                                                                                                                                          |
|------------------------|--------------------------------------------------------------------------------------------------------------------------------------------------------------------------------------------------------------------------------------------------------------------------------------------------------------------------------------------------------------------------------------------------------------------------------------------------------------------------------------------------------------------------------------------------------------------------------------------------------------------------------------------------------------------------------------------------------------------------------------------------------------------------------------------------------------------------------------------------------------------------------------------------------------------------------------------------------------------------------------------------------------------------------------------------------------------------------------------------------------------------------------------------------------------------------------------------------------------------------------------------------------------------------------------------------------------------|
|                        | <p>decision aid because it was presented in two different formats; several years have lapsed since the original decision aid was developed. Therefore, a rapid review of clinical practice guidelines and systematic reviews of randomized controlled trials was performed to ensure the data provided were up-to-date</p> <p><u>Stakeholder engagement:</u> decision aid was reviewed by the process coordinator and by a linguistic expert to ensure that culturally and technically inappropriate recommendations were removed; consensus translated version after resolving divergences within the translation, followed by back translation by a professional translator, native speaker of English, fluent in Portuguese; individual interviews in which participants are asked to share their impressions aloud while they are going through the decision aid; updated the decision aid according to the interviewees' feedback, followed by a round of five interviews to further refine; After comprehension testing, proofreading was conducted by two native Portuguese speakers selected by the process coordinator, who had not read the decision aid before</p> <p><u>Resources utilized:</u> translation committee (process coordinator; linguistic expert; translators)</p> <p><u>Evaluation:</u> NR</p> |
| Best<br>2012<br>USA    | <p><u>Product creation:</u> development of a new KT product (spiritually-framed breast cancer screening messages)</p> <p><u>Literature/product search:</u> NR</p> <p><u>Stakeholder engagement:</u> three nominal group sessions with African American women were conducted to identify and prioritize the most important spiritual elements to be included in breast cancer screening messaging</p> <p><u>Resources utilized:</u> NR</p> <p><u>Evaluation:</u> RCT to evaluate the effectiveness of the spiritually-framed messaging compared to more traditional messaging for breast cancer screening</p>                                                                                                                                                                                                                                                                                                                                                                                                                                                                                                                                                                                                                                                                                                             |
| Bilbrey<br>2018<br>USA | <p><u>Product creation:</u> development of a new KT product (culturally appropriate brain donation decision aid materials)</p> <p><u>Literature/product search:</u> gathered information about existing rates of brain donation from successful Alzheimer's Disease Centers to identify key barriers to brain donation; review of literature</p> <p><u>Stakeholder engagement:</u> two local focus groups in Spanish with promotoras (indigenous persons who go into homes and provide health education and basic health screenings to Latino families) to ask about their attitudes and beliefs toward brain donation; survey in English and Spanish that was emailed to local Latino health providers and families about current topic knowledge; multi-cultural, multi-lingual working group decided that a brochure to take home for undecided enrollees would be beneficial to discuss brain donation with family members; a near final version was then translated by bilingual staff</p> <p><u>Resources utilized:</u> NR</p> <p><u>Evaluation:</u> feedback was requested from local promotoras for ease of conceptual understanding, review of graphics, and approachability of material</p>                                                                                                                    |

|                                |                                                                                                                                                                                                                                                                                                                                                                                                                                                                                                                                                                                                                                                                                                                                                                                                                                                                                                                                                                                                                                                                                                                                                                                                                                                                                                                                                                                                                                                                                              |
|--------------------------------|----------------------------------------------------------------------------------------------------------------------------------------------------------------------------------------------------------------------------------------------------------------------------------------------------------------------------------------------------------------------------------------------------------------------------------------------------------------------------------------------------------------------------------------------------------------------------------------------------------------------------------------------------------------------------------------------------------------------------------------------------------------------------------------------------------------------------------------------------------------------------------------------------------------------------------------------------------------------------------------------------------------------------------------------------------------------------------------------------------------------------------------------------------------------------------------------------------------------------------------------------------------------------------------------------------------------------------------------------------------------------------------------------------------------------------------------------------------------------------------------|
| <p>Drago<br/>2018<br/>USA</p>  | <p><u>Product creation</u>: development of a new KT product (decision aid for parents facing imminent extreme premature delivery)<br/> <u>Literature/product search</u>: a literature review of published, relevant data on unique cultural aspects of Latino health care and communication barriers with Spanish-speaking patients created a theoretical framework to evaluate our findings<br/> <u>Stakeholder engagement</u>: interviews with Latino parents of infants born before 26 weeks gestational age, with trained medical interpreter; Interview themes and items were compared to those found in the development of the English decision-aid to identify novel themes to be addressed by the Spanish decision-aid; research team reviewed themes and adapted decision-aid through iterative process; certified medical transcription service was used to ensure accuracy of the Spanish wording on the adapted decision-aid, which was tested for face validity by four Spanish-speakers not participating in the study<br/> <u>Resources utilized</u>: trained medical interpreter; certified medical transcription service<br/> <u>Evaluation</u>: usefulness of Spanish decision aid assessed through simulated antenatal counseling session from the vantage point of a parent expecting the imminent delivery of an infant at 23-week gestation; member of the research team conducted the simulated counseling sessions in Spanish using a memorized script</p>           |
| <p>Gordon<br/>2015<br/>USA</p> | <p><u>Product creation</u>: development of a new KT product (culturally targeted website consistent with adult learning theories)<br/> <u>Literature/product search</u>: inspired by educational sessions targeted to Hispanic transplant patients that are provided by Northwestern University's Hispanic Kidney Transplant Program; used theoretical approaches to guide website design<br/> <u>Stakeholder engagement</u>: nine focus groups over three months with 76 Hispanic kidney transplant candidates living donors, dialysis patients, and members of the general public<br/> <u>Resources utilized</u>: Northwestern faculty, including a medical anthropologist/ethicist with expertise in ethical issues relating to kidney transplantation and donation, health services researcher, instructional design health educators, a Hispanic transplant surgeon, and a Hispanic research staff member, and the National Kidney Foundation of Illinois, including the former Chief Executive Officer, the Hispanic community outreach staff member, and the former marketing expert; two additional staff members later assisted in translation processes, for a total of five Hispanic, bilingual team members<br/> <u>Evaluation</u>: Usability testing was conducted by a third-party contractor with 18 Hispanic kidney transplant recipients and living kidney donors to assess users' ability to effectively navigate the website and satisfaction with the website design</p> |
| <p>Grasaas<br/>2019</p>        | <p><u>Product creation</u>: adaptation of an existing KT product (self-management app; 10-step process of preparation and forward translation to Norwegian and adaption of software interface text from Canadian English)</p>                                                                                                                                                                                                                                                                                                                                                                                                                                                                                                                                                                                                                                                                                                                                                                                                                                                                                                                                                                                                                                                                                                                                                                                                                                                                |



|                           |                                                                                                                                                                                                                                                                                                                                                                                                                                                                                                                                                                                                                                                                                                                                                                                                                                                                                                                                                                                                                                                          |
|---------------------------|----------------------------------------------------------------------------------------------------------------------------------------------------------------------------------------------------------------------------------------------------------------------------------------------------------------------------------------------------------------------------------------------------------------------------------------------------------------------------------------------------------------------------------------------------------------------------------------------------------------------------------------------------------------------------------------------------------------------------------------------------------------------------------------------------------------------------------------------------------------------------------------------------------------------------------------------------------------------------------------------------------------------------------------------------------|
| Norway                    | <p><u>Literature/product search</u>: NR</p> <p><u>Stakeholder engagement</u>: expert panel of researchers within field of pain ensured that two versions were conceptually equivalent, two adolescents assess pain education library to ensure content was clear and easy to understand, review by end users after the usability field test to check its understandability and cultural relevance, review of cognitive debriefing, proofreading, and final report assessed by the project group</p> <p><u>Resources utilized</u>: experts in field of pain; translator</p> <p><u>Evaluation</u>: laboratory usability assessment: each participant completed 10 predefined tasks with the app; completed System Usability Scale questionnaire; and interview guided by 14 open ended questions. Field usability test: five adolescents with persistent pain tested the app continuously over a period of 2 weeks to assess user experience over time and to identify any need for further assistance while using the app; answered electronic survey</p> |
| Grinker<br>2015<br>USA    | <p><u>Product creation</u>: adaption of an existing KT product (Autism Speaks First 100 Days Kit)</p> <p><u>Literature/product search</u>: NR</p> <p><u>Stakeholder engagement</u>: unstructured individual and group interviews with Korean child health and education professionals to identify barriers to diagnosis and care, generate broad ideas about the range of cultural notions about developmental disorders; with Korean mothers employed a version of “cultural modeling” or “culture as consensus” methods, which assess the degree to which individuals in a group share a set of beliefs; free-listening with Korean mothers</p> <p><u>Resources utilized</u>: child health and education professionals (psychologists, pediatricians, teachers, and social workers)</p> <p><u>Evaluation</u>: NR</p>                                                                                                                                                                                                                                   |
| Guttman<br>2013<br>Israel | <p><u>Product creation</u>: development of a new KT product (health rights information materials)</p> <p><u>Literature/product search</u>: NR</p> <p><u>Stakeholder engagement</u>: steering committee consisting of members from five advocacy organizations, four specifically working with the Ethiopian immigrant population themselves, Ethiopian immigrants, and a health rights organization; semi-structured group and personal interviews with community members; included four discussion sessions with steering committee members;</p> <p><u>Resources utilized</u>: nurses, social workers, and health care liaison workers</p> <p><u>Evaluation</u>: NR</p>                                                                                                                                                                                                                                                                                                                                                                                 |
| Harvey<br>2011<br>USA     | <p><u>Product creation</u>: development of a new KT product (written health brochures on common health information to promote health literacy)</p>                                                                                                                                                                                                                                                                                                                                                                                                                                                                                                                                                                                                                                                                                                                                                                                                                                                                                                       |

|                            |                                                                                                                                                                                                                                                                                                                                                                                                                                                                                                                                                                                                                                                                                                                                                                                                                                                                                                                                                                           |
|----------------------------|---------------------------------------------------------------------------------------------------------------------------------------------------------------------------------------------------------------------------------------------------------------------------------------------------------------------------------------------------------------------------------------------------------------------------------------------------------------------------------------------------------------------------------------------------------------------------------------------------------------------------------------------------------------------------------------------------------------------------------------------------------------------------------------------------------------------------------------------------------------------------------------------------------------------------------------------------------------------------|
|                            | <p><u>Literature/product search</u>: identified appropriate topics through Internet-based review of health information sources (public health authorities, federal agencies, disease-specific foundations) for model examples to inform development; systematic observation of patients at clinic; identified appropriate topics</p> <p><u>Stakeholder engagement</u>: interviews with staff and clinic patients about their experiences with written health materials; multiple revisions over the course of three months to ensure all content maintained high standards of medical accuracy and cultural and linguistic competence</p> <p><u>Resources utilized</u>: volunteer graphic designer; Spanish speaking nurse</p> <p><u>Evaluation</u>: convenience sample were asked their opinion on draft versions about ease of understanding, was content visually appealing, were images of families powerful; used the Fernandez–Huerta readability equation</p>      |
| Hashim<br>2013<br>UAE      | <p><u>Product creation</u>: creation of a new KT product (content and design preferences of printed health education leaflets)</p> <p><u>Literature/product search</u>: NR</p> <p><u>Stakeholder engagement</u>: interviews with Arabic-speaking participants recruited from clinic waiting areas, to measure design preferences (print format, font, numerals and images); focus groups conducted with university administration, city zoo staff, and residents of local community</p> <p><u>Resources utilized</u>: experienced moderator</p> <p><u>Evaluation</u>: NR</p>                                                                                                                                                                                                                                                                                                                                                                                              |
| Hempler<br>2015<br>Denmark | <p><u>Product creation</u>: development of a new KT product (culturally sensitive dialog for diabetes management)</p> <p><u>Literature/product search</u>: observation of individual education session; observing patient journey in the clinic</p> <p><u>Stakeholder engagement</u>: interactive workshop with dietitians and researchers; workshop for idea generation with researchers, an industrial designer, and dieticians; interviews with two patients and two health care professionals with Pakistani background; prototype feedback through interviews with patients and dietitians</p> <p><u>Resources utilized</u>: public health researchers, behavioral and educational science; four dietitians, an industrial designer, a nutritional scientist with managerial responsibility</p> <p><u>Evaluation</u>: Testing of selected products in group-based patient education sessions; workshops; testing in individual patient education; final workshop</p> |
| Lee<br>2019<br>USA         | <p><u>Product creation</u>: development of a new KT product (mobile health intervention)</p> <p><u>Literature/product search</u>: NR</p> <p><u>Stakeholder engagement</u>: series of focus groups with young Korean American immigrant women to identify barriers and develop motivators and trigger for Pap test update; regular meetings with community advisory board members and mobile technology developers to get feedback and refine the mScreening; recordings transcribed by a bilingual Korean research assistant, reviewed by the research team</p>                                                                                                                                                                                                                                                                                                                                                                                                           |

|                                  |                                                                                                                                                                                                                                                                                                                                                                                                                                                                                                                                                                                                                                                                                                                                                                                                                                                                                                                                                                                                                                                                                                                                              |
|----------------------------------|----------------------------------------------------------------------------------------------------------------------------------------------------------------------------------------------------------------------------------------------------------------------------------------------------------------------------------------------------------------------------------------------------------------------------------------------------------------------------------------------------------------------------------------------------------------------------------------------------------------------------------------------------------------------------------------------------------------------------------------------------------------------------------------------------------------------------------------------------------------------------------------------------------------------------------------------------------------------------------------------------------------------------------------------------------------------------------------------------------------------------------------------|
|                                  | <p><u>Resources utilized</u>: community advisory board members (Korean American immigrant women in their 20s, a Korean American physician, a Korean American nurse, and religious and community leaders); mobile technology developers; mobile phone technology experts</p> <p><u>Evaluation</u>: NR</p>                                                                                                                                                                                                                                                                                                                                                                                                                                                                                                                                                                                                                                                                                                                                                                                                                                     |
| Li<br>2012<br>USA                | <p><u>Product creation</u>: development of new KT product (hypertension CD-ROM including visual aids and audio features)</p> <p><u>Literature/product search</u>: conducted a literature review; accessed previous study findings; lead investigator with prior experience working with hypertension in older Chinese immigrants</p> <p><u>Stakeholder engagement</u>: first draft presented to healthcare providers and interdisciplinary health research team; materials revised based on experts' suggestions</p> <p><u>Resources utilized</u>: interdisciplinary health research team (geriatric nurse scientist, gerontologist, epidemiologist, psychologist)</p> <p><u>Evaluation</u>: Semi-structured individual and focus group interviews with Chinese immigrants were then conducted to evaluate the use of the product</p>                                                                                                                                                                                                                                                                                                        |
| Mathieson<br>2012<br>New Zealand | <p><u>Product creation</u>: adaptation of an existing KT product (cognitive behavioural therapy self-management)</p> <p><u>Literature/product search</u>: review of the literature</p> <p><u>Stakeholder engagement</u>: partnership was formed with a Maori health researcher; researchers established relationships with local providers, conducted interviews with patients and clinicians, and had face-to-face contact with patients to collect intake and outcome data; semi-structured interviews conducted with nine general practitioners and nine primary care nurses to review existing material and suggest how it would need to be adapted to better meet needs of Maori patients; semi-structured, individual face-to-face interviews conducted with six potential patient users</p> <p><u>Resources utilized</u>: Maori health researcher; graphic designer</p> <p><u>Evaluation</u>: clinician and patient satisfaction questionnaires, based on a five-point Likert scale to indicate levels of agreement or disagreement; both patient and clinician feedback had suggested that full translation would not be helpful</p> |
| Meherali<br>2021<br>Canada       | <p><u>Product creation</u>: development of a new KT product (whiteboard animation video on croup)</p> <p><u>Literature/product search</u>: systematic review to determine the information needs of parents whose children have acute otitis media (AOM)</p> <p><u>Stakeholder engagement</u>: 16 individual qualitative interviews with parents who sought care for AOM in a hospital emergency department to understand their information needs and their experiences of having children with AOM; KT products developed (whiteboard video and infographic); after sharing stage 1 and 2 results with a creative team (storywriter, graphic designer, and editor), KT product prototypes were developed; this involved</p>                                                                                                                                                                                                                                                                                                                                                                                                                  |

|                       |                                                                                                                                                                                                                                                                                                                                                                                                                                                                                                                                                                                                                                                                                                                                                                                                                                                                                                                                                                                                                                                                                                                                                                                                                                                                                                                                                                                       |
|-----------------------|---------------------------------------------------------------------------------------------------------------------------------------------------------------------------------------------------------------------------------------------------------------------------------------------------------------------------------------------------------------------------------------------------------------------------------------------------------------------------------------------------------------------------------------------------------------------------------------------------------------------------------------------------------------------------------------------------------------------------------------------------------------------------------------------------------------------------------------------------------------------------------------------------------------------------------------------------------------------------------------------------------------------------------------------------------------------------------------------------------------------------------------------------------------------------------------------------------------------------------------------------------------------------------------------------------------------------------------------------------------------------------------|
|                       | <p>creating a composite narrative (a compilation of common themes from the parental interviews), ensuring that the narrative integrated the best available research; after revision, a professional translator translated the products</p> <p><u>Resources utilized</u>: storyteller, graphic designer, editor, translator</p> <p><u>Evaluation</u>: mixed-methods evaluation process (surveys and focus groups) to determine the usability, usefulness, and cultural appropriateness of the KT product for Pakistani parents</p>                                                                                                                                                                                                                                                                                                                                                                                                                                                                                                                                                                                                                                                                                                                                                                                                                                                     |
| Norris<br>2021<br>USA | <p><u>Product creation</u>: adaptation of existing KT product (Mighty Girls app to support sexual health behavior change)</p> <p><u>Literature/product search</u>: NR</p> <p><u>Stakeholder engagement</u>: iterative process involving consultation and two implementations of the classroom sessions, with the second implementation serving as a pilot study; research assistants were tasked with reviewing the Mighty Girls classroom session program manual and slide sets for language, terminology, and image inclusivity; each implementation involved a two-person multicultural teaching team consisting of either the first or third author in the teaching role and one of the three research assistants in the teaching assistant role; each Mighty Teens classroom session was delivered and then followed by a short focus group led by the teaching team; in lieu of focus group the second implementation completed paper based pre-and post-tests;</p> <p><u>Resources utilized</u>: research assistants were female middle school staff members and three adult women in their early 20s (two African American women and one biracial African American/Native American woman)</p> <p><u>Evaluation</u>: usability testing performed at each school using their own Android phone or one provided by research team; focus groups with parents to gauge support</p> |
| Rami<br>2018<br>Egypt | <p><u>Product creation</u>: adaptation of an existing KT product (schizophrenia leaflet)</p> <p><u>Literature/product search</u>: research team undertook a literature review of theoretical and intervention papers to identify important factors for successful cultural adaptation of psychosocial interventions in schizophrenia</p> <p><u>Stakeholder engagement</u>: adapted with patients and caregivers</p> <p><u>Resources utilized</u>: Egyptian patients meeting DSM-IV criteria for schizophrenia and at least one caregiver</p> <p><u>Evaluation</u>: pilot tested with 20 patients who were not included in the main study to examine acceptability and linguistic accessibility of the products and educational materials and further modifications were made to improve the fit with the Egyptian cultural context</p>                                                                                                                                                                                                                                                                                                                                                                                                                                                                                                                                                |
| Sharpe<br>2013<br>USA | <p><u>Product creation</u>: development of a new KT product (educational brochure on HPV)</p> <p><u>Literature/product search</u>: conduct literature review on women's knowledge of human papillomavirus, pap tests, and cervical cancer</p> <p><u>Stakeholder engagement</u>: worked with the Cherokee Women's Wellness Center (CWWC) staff to develop and evaluate educational material; identify communication strategy with audience; through in-depth interviews gathered audience specific input</p> <p><u>Resources utilized</u>: CWWC nurses, tribes' graphic artist, rural, primary health care clinics</p>                                                                                                                                                                                                                                                                                                                                                                                                                                                                                                                                                                                                                                                                                                                                                                 |

|                                 |                                                                                                                                                                                                                                                                                                                                                                                                                                                                                                                                                                                                                                                                                                                                                                                                                                                                                                                                                                                                                                                                                                                                                                                                                                                                                                                                                     |
|---------------------------------|-----------------------------------------------------------------------------------------------------------------------------------------------------------------------------------------------------------------------------------------------------------------------------------------------------------------------------------------------------------------------------------------------------------------------------------------------------------------------------------------------------------------------------------------------------------------------------------------------------------------------------------------------------------------------------------------------------------------------------------------------------------------------------------------------------------------------------------------------------------------------------------------------------------------------------------------------------------------------------------------------------------------------------------------------------------------------------------------------------------------------------------------------------------------------------------------------------------------------------------------------------------------------------------------------------------------------------------------------------|
|                                 | <p><u>Evaluation</u>: establish criteria for evaluation of existing materials based on review of educational materials; pretesting done with women to assess perceived meaning, format, appearance and comfort level with the content, and cultural relevance</p>                                                                                                                                                                                                                                                                                                                                                                                                                                                                                                                                                                                                                                                                                                                                                                                                                                                                                                                                                                                                                                                                                   |
| Stanley<br>2018<br>USA          | <p><u>Product creation</u>: adaptation of existing KT product (reducing substance use)</p> <p><u>Literature/product search</u>: NR</p> <p><u>Stakeholder engagement</u>: campaign discussed with community advisory committee who provided input on campaign development and implementation, focus groups with 7<sup>th</sup> graders with notes taken rather than recording, students ranked examples of text and visuals, participants were asked about best ways to deliver campaign messages to them and their use of technology; high school students given disposable cameras to take pictures corresponding to questions, photos discussed with staff</p> <p><u>Resources utilized</u>: community members, school staff</p> <p><u>Evaluation</u>: NR</p>                                                                                                                                                                                                                                                                                                                                                                                                                                                                                                                                                                                     |
| van der Steen<br>2013<br>Canada | <p><u>Product creation</u>: adaptation of an existing KT product (dementia booklet)</p> <p><u>Literature/product search</u>: NR</p> <p><u>Stakeholder engagement</u>: local teams (researchers, ethicists and physicians) in dementia palliative care first translated the original English version; back translated by professional translator and evaluated by the developer of the booklet for adherence to the central message; local teams included any subsequent adaptations in the final text in English for analyses; Dutch and Japanese versions were revised in response to results of the acceptability studies on which articles appeared in local professional journals. Suggestions provided by professional caregivers (and families, Dutch version); with help of professional language services, Dutch version simplified language to a European Standard B1 level; Japanese version was revised in response to the acceptability study as well, considering the responses of nursing home staff</p> <p><u>Resources utilized</u>: professional translators, researchers, ethicists, physicians, nursing home staff</p> <p><u>Evaluation</u>: an international acceptability study was initiated, evaluating and comparing acceptability and usefulness of the adapted and original versions among families and practitioners</p> |
| Van Son<br>2014<br>USA          | <p><u>Product creation</u>: adaptation of an existing KT product (diabetes educational materials, based on existing diabetes education handouts such as food exchange lists and self-care, physical activity, and menu-planning guides)</p> <p><u>Literature/product search</u>: NR</p> <p><u>Stakeholder engagement</u>: interdisciplinary team reviewed existing materials, based on the team's clinical experience and the input of the Russian cultural consultants, two new dietary hand outs were created and translated into Russian; focus group of Russian speaking immigrants evaluating the readability, word selection,</p>                                                                                                                                                                                                                                                                                                                                                                                                                                                                                                                                                                                                                                                                                                             |

|  |                                                                                                                                                                                                                                                                                                                                                                                                                                                                                                                                                                                                                                |
|--|--------------------------------------------------------------------------------------------------------------------------------------------------------------------------------------------------------------------------------------------------------------------------------------------------------------------------------------------------------------------------------------------------------------------------------------------------------------------------------------------------------------------------------------------------------------------------------------------------------------------------------|
|  | <p>illustrations, and cultural relevance of the materials; diabetes educators and clinicians in various clinic settings volunteered to use and evaluate the drafted materials</p> <p><u>Resources utilized:</u> Russian-speaking health care providers, a home health nurse, a certified diabetes nurse educator, Russian speaking interpreters, a certified diabetes dietitian educator, a community education expert, a nurse gerontologist, and a physical therapist, certified medical translators</p> <p><u>Evaluation:</u> focus groups and telephone survey used to evaluate materials, with patients and providers</p> |
|--|--------------------------------------------------------------------------------------------------------------------------------------------------------------------------------------------------------------------------------------------------------------------------------------------------------------------------------------------------------------------------------------------------------------------------------------------------------------------------------------------------------------------------------------------------------------------------------------------------------------------------------|

KMb, knowledge translation; NR, not reported

**Table 3: Creation/Adaptation components and stakeholder engagement utilized in included studies**

| Study                  | Type of Theoretical Framework/ Theory/ Model                                                                                   | Creation/Adaptation Components*                                                          |                                                                                                                       | Types of Stakeholder Engagement** |         |         |             |         | Lessons Learned                                                                                                                                                                              |
|------------------------|--------------------------------------------------------------------------------------------------------------------------------|------------------------------------------------------------------------------------------|-----------------------------------------------------------------------------------------------------------------------|-----------------------------------|---------|---------|-------------|---------|----------------------------------------------------------------------------------------------------------------------------------------------------------------------------------------------|
|                        |                                                                                                                                | Surface                                                                                  | Deep                                                                                                                  | Inform                            | Consult | Involve | Collaborate | Support | Researcher Experiences                                                                                                                                                                       |
| Abbas-Dick 2018 Canada | Participatory Action Research <sup>13</sup><br>Community-based Participatory Research <sup>54</sup>                            | - Changed layout of information<br>- Changed mode of delivery                            | - Improved cultural relevance of the content and communication based on specific cultural barriers identified         | ✓                                 | ✓       | ✓       | ✓           | ✓       | NR                                                                                                                                                                                           |
| Ali 2018 UK            | Social marketing, culturally competent participatory investigation and user-centred healthcare design <sup>50, 52, 55-57</sup> | - Changed the layout of information                                                      | - Assessed the cultural relevance and application with community members and adapted visuals and language accordingly | ✓                                 | ✓       | ✓       | ✓           | ✓       | “The use of a co-design approach was helpful in terms of putting in place linkages with community-based organizations and venues through which the resultant materials could be distributed” |
| Arnold 2011 USA        | NR                                                                                                                             | - Changed visuals to appear more consistent with cultural images                         | - Participants modified the voices and language to express their cultural values and traditions                       | ✓                                 | ✓       | ✓       | ✓           | ✓       | NR                                                                                                                                                                                           |
| Baptista 2020 Portugal | Translation is not enough – European Centre for Disease Prevention and Control <sup>58</sup>                                   | - Forward and back linguistic translation<br>- Changed visuals to appear more consistent | - Changed the context to match the healthcare provisions in Portugal<br>- Assessment of barriers to healthcare access | NR                                | ✓       | ✓       | NR          | NR      | NR                                                                                                                                                                                           |

|                     |                                                                                                                                                                |                                                                                                  |                                                                                                                                                                     |    |   |   |    |    |    |
|---------------------|----------------------------------------------------------------------------------------------------------------------------------------------------------------|--------------------------------------------------------------------------------------------------|---------------------------------------------------------------------------------------------------------------------------------------------------------------------|----|---|---|----|----|----|
|                     |                                                                                                                                                                | with cultural images.                                                                            | for Portuguese men                                                                                                                                                  |    |   |   |    |    |    |
| Best 2012 USA       | Fractured Paradigm of Media Framing <sup>59</sup><br>Religiosity, spirituality, and the design of health communication message and interventions <sup>60</sup> | - Changed visuals to appear more consistent with cultural images                                 | - Identified and prioritized the most important spiritual elements to be included in messages targeted to African American women                                    | NR | ✓ | ✓ | NR | NR | NR |
| Bilbrey 2018 USA    | NR                                                                                                                                                             | - Changed visuals to appear more consistent with cultural images                                 | - Community conversations guided content creation of brochures on brain donation                                                                                    | ✓  | ✓ | ✓ | ✓  | NR | NR |
| Drago 2018 USA      | NR                                                                                                                                                             | - Linguistic translation                                                                         | - Themes from birthing experiences of the target population were included                                                                                           | ✓  | ✓ | ✓ | ✓  | NR | NR |
| Gordon 2015 USA     | Gagne's Conditions of Learning Theory <sup>61</sup> and Bandura's Social Cognitive Theory <sup>62</sup>                                                        | - Used colors to coincide with Hispanic sensibilities<br>- Pictures of traditional Hispanic food | - Focus groups were used to discuss the cultural beliefs and myths about kidney donation<br>- content delivery such as through immersive multimedia and telenovelas | ✓  | ✓ | ✓ | ✓  | NR | NR |
| Grasaas 2019 Norway | Translation and Cultural Adaptation of                                                                                                                         | - Forward linguistic translation                                                                 | - Involved end-users to assess the content for relevance                                                                                                            | NR | ✓ | ✓ | NR | NR | NR |



|                     |                                         |                                                                                                                |                                                                                              |    |   |    |    |    |    |
|---------------------|-----------------------------------------|----------------------------------------------------------------------------------------------------------------|----------------------------------------------------------------------------------------------|----|---|----|----|----|----|
|                     | Patient Reported Outcomes <sup>63</sup> | - Replaced names organizations to be culturally relevant                                                       |                                                                                              |    |   |    |    |    |    |
| Grinker 2015 USA    | Cultural Consensus Theory <sup>64</sup> | - Changed language to that preferred by end-users                                                              | - Mothers, teachers, and clinicians provided context for mental health conditions            | NR | ✓ | ✓  | ✓  | NR | NR |
| Guttman 2013 Israel | NR                                      | - Forward and back linguistic translation<br>- Changed visuals to appear more consistent with cultural images. | - Solutions were based on the actual stories and recommendations of members of the community | ✓  | ✓ | ✓  | ✓  | ✓  | NR |
| Harvey 2011 USA     | Precede-Proceed Model <sup>65</sup>     | - Forward linguistic translation<br>- Changed visuals to appear more consistent with cultural images.          | NR                                                                                           | NR | ✓ | NR | NR | NR | NR |
| Hashim 2013 UAE     | NR                                      | - Forward and back linguistic translation<br>- Changed visuals to appear more consistent with cultural images. | Focus groups were held to discuss the application of suggestions for their culture           | NR | ✓ | ✓  | NR | NR | NR |

|                                  |    |                                                                               |                                                                                            |    |   |    |    |    |                                                                                                                                                                                                                                                                                                             |
|----------------------------------|----|-------------------------------------------------------------------------------|--------------------------------------------------------------------------------------------|----|---|----|----|----|-------------------------------------------------------------------------------------------------------------------------------------------------------------------------------------------------------------------------------------------------------------------------------------------------------------|
| Hempler<br>2015<br>Denmark       | NR | - Changed visuals to appear more consistent with cultural images              | - Researchers engaged with patient involvement about how dialog products work in real life | NR | ✓ | ✓  | ✓  | NR | “this process required a great deal of dialog between researchers and dieticians. Dieticians had a strong focus on the outcome, namely effective education, as opposed to the researchers’ strong focus on the process leading to effective education through designing, testing, and redesigning products” |
| Lee<br>2019<br>USA               | NR | - Changed visuals to appear more consistent with cultural images              | - Cultural misconceptions addressed through focus groups                                   | NR | ✓ | ✓  | ✓  | NR | NR                                                                                                                                                                                                                                                                                                          |
| Li<br>2012<br>USA                | NR | - Changed visuals to appear more consistent with cultural images              | NR                                                                                         | NR | ✓ | NR | NR | NR | NR                                                                                                                                                                                                                                                                                                          |
| Mathieson<br>2012<br>New Zealand | NR | - Changed visuals to appear more consistent with cultural images              | - Traditional practices were incorporated based on end-user comments                       | NR | ✓ | NR | NR | NR | “The experience of this adaptation was rewarding for the research team and offers a model for other areas of clinical practice”                                                                                                                                                                             |
| Meherali<br>2021<br>Canada       | NR | - Forward and back linguistic translation<br>- Changed visuals to appear more | - Inclusion of the cultural contexts for seeking healthcare                                | NR | ✓ | ✓  | ✓  | ✓  | NR                                                                                                                                                                                                                                                                                                          |

|                           |                                                 |                                                                                                               |                                                                                                                    |    |   |   |    |    |                                                                                                                                                                         |
|---------------------------|-------------------------------------------------|---------------------------------------------------------------------------------------------------------------|--------------------------------------------------------------------------------------------------------------------|----|---|---|----|----|-------------------------------------------------------------------------------------------------------------------------------------------------------------------------|
|                           |                                                 | consistent with cultural images                                                                               |                                                                                                                    |    |   |   |    |    |                                                                                                                                                                         |
| Norris 2021 USA           | NR                                              | - Changed language to that preferred by end-users                                                             | NR                                                                                                                 | NR | ✓ | ✓ | ✓  | NR | NR                                                                                                                                                                      |
| Rami 2018 Egypt           | NR                                              | - Changed language to that preferred by end-users                                                             | - Cultural contexts in Egyptian society were noted by researchers                                                  | NR | ✓ | ✓ | NR | NR | “Positive perspectives of adapted information materials do not guarantee adherence to programs, particularly with culturally stigmatized conditions like schizophrenia” |
| Sharpe 2013 USA           | NR                                              | - Changed visuals to appear more consistent with cultural images.                                             | - Continued involvement from partners directed content selection for the materials.                                | ✓  | ✓ | ✓ | ✓  | ✓  | NR                                                                                                                                                                      |
| Stanley 2018 USA          | Cultural Adaptation of Treatments <sup>66</sup> | - Changed language to that preferred by end-users                                                             | - Use of culturally significant leaders for messaging and used messaging consistent with the experiences of youth. | NR | ✓ | ✓ | ✓  | ✓  | NR                                                                                                                                                                      |
| van der Steen 2013 Canada | NR                                              | - Forward and back linguistic translation<br>- Changed visuals to appear more consistent with cultural images | - Changed the level of involvement of the healthcare providers to match real-word scenarios                        | NR | ✓ | ✓ | ✓  | NR | NR                                                                                                                                                                      |

|                        |    |                                                                                 |    |    |   |   |   |    |    |
|------------------------|----|---------------------------------------------------------------------------------|----|----|---|---|---|----|----|
| Van Son<br>2014<br>USA | NR | - Changed<br>visuals to<br>appear more<br>consistent<br>with cultural<br>images | NR | NR | ✓ | ✓ | ✓ | NR | NR |
|------------------------|----|---------------------------------------------------------------------------------|----|----|---|---|---|----|----|

NR; Not reported, ✓ denotes whether the corresponding stakeholder engagement process was used.

\* From: Resnicow K, Baranowski T, Ahluwalia JS, Braithwaite RL. Cultural sensitivity in public health: defined and demystified. Ethnicity & disease. 1999 Jan 1;9(1):10-21. <sup>7</sup>

\*\*From: i2S Stakeholder Engagement Options Framework (modified from the IAP2 (International Association for Public Participation) public participation spectrum) (Bammer, 2021) <sup>12</sup>

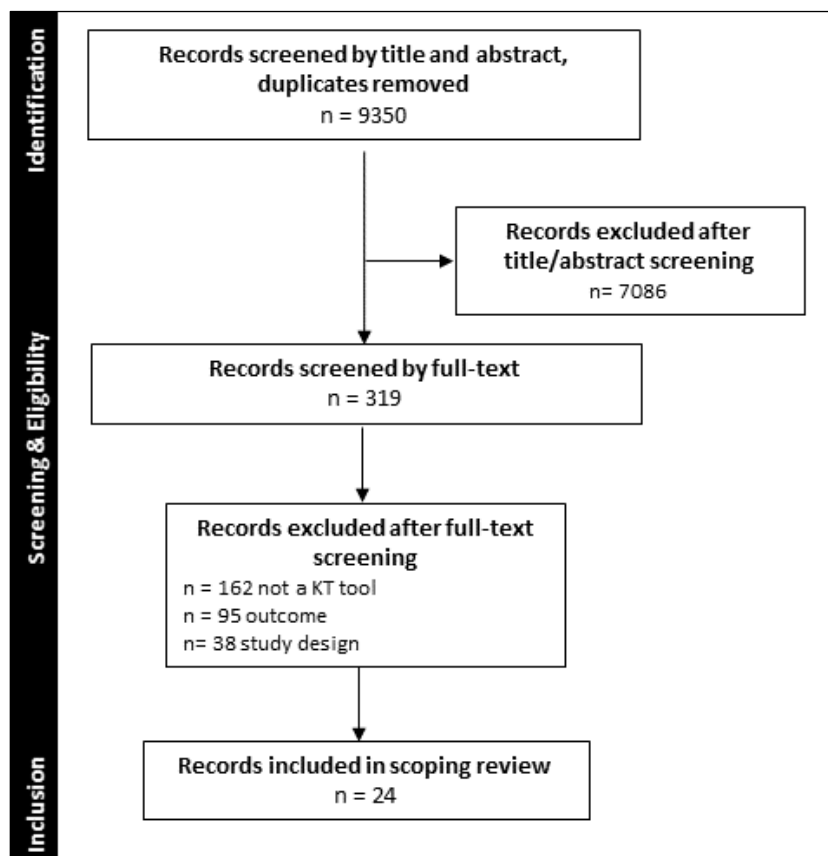

**Figure 1:** PRISMA flow diagram

## Supplementary Material A: Eligibility criteria

| Characteristic   | Inclusion Criteria                                                                                                                                                                                                                                                                                                                                                              | Exclusion Criteria                                                                                                                                                                                                                                                                                                                                                                                             |
|------------------|---------------------------------------------------------------------------------------------------------------------------------------------------------------------------------------------------------------------------------------------------------------------------------------------------------------------------------------------------------------------------------|----------------------------------------------------------------------------------------------------------------------------------------------------------------------------------------------------------------------------------------------------------------------------------------------------------------------------------------------------------------------------------------------------------------|
| Publication date | The last 10 years (2011 onwards)                                                                                                                                                                                                                                                                                                                                                | Prior to 2011                                                                                                                                                                                                                                                                                                                                                                                                  |
| Language         | English                                                                                                                                                                                                                                                                                                                                                                         | Languages other than English                                                                                                                                                                                                                                                                                                                                                                                   |
| Study design     | <p>Primary studies: qualitative, quantitative, mixed methods</p> <p>Reviews or overviews of reviews; theses and dissertations</p> <p>Opinion pieces (e.g. commentaries, editorials) published in peer-reviewed journals</p>                                                                                                                                                     | Unpublished opinions pieces (e.g. blogs, online commentaries) and manuscripts                                                                                                                                                                                                                                                                                                                                  |
| Population       | <p>Patients/public/consumers of any age (e.g. adults and children) from culturally and linguistically diverse communities</p> <p>Researchers who have worked with culturally and linguistically diverse audiences during the cultural adaptation process.</p>                                                                                                                   | <p>Non-patients/public/consumers (e.g. health care provider, medical practitioner, nurse, teacher, school administrator, legislator, epidemiologist, community health worker, policy analyst).</p> <p>Non-researchers who belong to majority cultural groups</p>                                                                                                                                               |
| KMb Product      | <p>Creation or adaptation of a KMb product for culturally and linguistically diverse communities</p> <p>Defined as products presenting research-based information in user-friendly language and format(s) to support decision-making (e.g. it might be information to help make the decision, or decision to implement a certain skill or behaviour, or reminders to do so)</p> | <p>Creation or adaptation of a <i>health intervention or promotion program</i> for culturally and linguistically diverse communities.</p> <p>Intervention or promotion materials or programs that include tangible products for their target population to help implement the intervention or learn a specific skill set</p> <p>Non health related implementation or KMb products/interventions/strategies</p> |
| Outcome          | <p>Methods and processes of developing or culturally adapting KMb products related to health</p> <p>Evaluations, considerations/lessons learned for adapting or developing health information for culturally and linguistically diverse communities</p>                                                                                                                         | <p>Processes entailing purely linguistic adaptations of health information</p> <p>Studies listing cultural adaptation, without further explanation of processes</p>                                                                                                                                                                                                                                            |

|  |  |                                                                                                |
|--|--|------------------------------------------------------------------------------------------------|
|  |  | Studies detailing the validation of translated documents (i.e. questionnaires and assessments) |
|--|--|------------------------------------------------------------------------------------------------|

## Supplementary Material B: Medline search strategy

- 1 Consumer Health Information/ (4095)
- 2 ((consumer\* or patient\* or public) adj2 health information).ti,ab,kf. (2194)
- 3 Health Promotion/ (77181)
- 4 (health adj2 (promotion\* or campaign\*)).ti,ab,kf. (40630)
- 5 Health Communication/ (2815)
- 6 health communication.ti,ab,kf. (3921)
- 7 exp Patient Education as Topic/ (87448)
- 8 ((patient\* or consumer\*) adj2 education\*).ti,ab,kf. (28891)
- 9 Translational Medical Research/ (11900)
- 10 ((knowledge adj3 (translat\* or transfer\* or mobiliz\* or mobilis\* or exchange or implement\* or disseminat\* or uptake or adopt\* or application\* or apply or applie\*)) and (service\* or tool\* or campaign\* or program\* or resource\* or product\*)).ti,ab,kf. (10353)
- 11 ((evidence adj3 (translat\* or transfer\* or mobiliz\* or mobilis\* or exchange or implement\* or disseminat\* or uptake or adopt\* or application\* or apply or applie\*)) and (service\* or tool\* or campaign\* or program\* or resource\* or product\*)).ti,ab,kf. (9326)
- 12 ((research adj3 (translat\* or transfer\* or mobiliz\* or mobilis\* or exchange or implement\* or disseminat\* or uptake or adopt\* or application\* or apply or applie\*)) and (service\* or tool\* or campaign\* or program\* or resource\* or product\*)).ti,ab,kf. (23587)
- 13 ((innovat\* adj3 (translat\* or transfer\* or mobiliz\* or mobilis\* or exchange or implement\* or disseminat\* or uptake or adopt\* or application\* or apply or applie\*)) and (service\* or tool\* or campaign\* or program\* or resource\* or product\*)).ti,ab,kf. (3574)
- 14 ((best practice\* adj3 (translat\* or transfer\* or mobiliz\* or mobilis\* or exchange or implement\* or disseminat\* or uptake or adopt\* or application\* or apply or applie\*)) and (service\* or tool\* or campaign\* or program\* or resource\* or product\*)).ti,ab,kf. (1510)
- 15 ("knowledge into practice" or "knowledge to practice" or "knowledge into action" or "knowledge to action").ti,ab,kf. (5403)
- 16 ("evidence into practice" or "evidence to practice" or "evidence into action" or "evidence to action").ti,ab,kf. (13608)
- 17 ("research into practice" or "research to practice" or "research into action" or "research to action").ti,ab,kf. (12970)
- 18 ("innovation\* into practice" or "innovation\* to practice" or "innovation into action" or "innovation to action").ti,ab,kf. (251)



- 19 (evidence based adj2 (program\* or service\* or intervention\* or campaign\* or tool\* or resource\*)),ti,ab,kf. (11038)
- 20 (KMb adj2 (product\* or tool\* or intervention\* or strateg\* or campaign\* or service\*)),ti,ab,kf. (306)
- 21 (brochure\* or booklet\* or pamphlet\*).ti,ab,kf,hw. (10594)
- 22 ((app or apps or application\*) adj3 (mobile or device\* or cell\* or iphone\* or android\* or smart-phone\* or smartphone\*)),ti,ab,kf,hw. (46688)
- 23 (social media or facebook or instagram or twitter).ti,ab,kf,hw. (23959)
- 24 or/1-23 (367959)
- 25 Culture/ (33657)
- 26 cross-cultural comparison/ (26456)
- 27 Cultural Characteristics/ (16714)
- 28 Cultural Competency/ (5981)
- 29 Culturally Competent Care/ (1823)
- 30 cultural diversity/ (12046)
- 31 ((cultur\* or ethnocultur\*) adj5 (adapt\* or translat\* or modif\* or tailor\*)),ti,ab,kf. (21204)
- 32 ((transcultur\* or crosscultur\* or multicultur\*) adj5 (adapt\* or translat\* or modif\* or tailor\*)),ti,ab,kf. (533)
- 33 ((cultur\* or ethnocultur\* or transcultur\* or crosscultur\* or multicultur\*) adj5 (divers\* or competen\* or appropriat\* or responsive or relevan\* or characteristic\*)),ti,ab,kf. (38389)
- 34 ((cultur\* or ethnocultur\*) adj4 (specific\* or sensitiv\* or inclusiv\*)),ti,ab,kf. (29812)
- 35 ((ethnic\* or minority or minorities) adj5 (adapt\* or translat\* or modif\* or tailor\*)),ti,ab,kf. (1526)
- 36 ((ethnic or minority or minorities) adj2 (communit\* or group\*)),ti,ab,kf. (45850)
- 37 (CALD adj2 (communit\* or group\* or background\*)),ti,ab,kf. (161)
- 38 ((cultur\* or ethnocultur\* or transcultur\* or crosscultur\* or multicultur\*) adj2 linguist\*).ti,ab,kf. (2995)
- 39 ((co-design\* or co-creat\* or codesign\* or cocreat\*) and (cultur\* or ethnic\* or ethnocultur\* or transcultur\* or crosscultur\* or multicultur\*)),ti,ab,kf,hw. (407)
- 40 ((participatory adj2 (design\* or research or framework\* or method\*)) and (cultur\* or ethnic\* or ethnocultur\* or transcultur\* or crosscultur\* or multicultur\*)),ti,ab,kf,hw. (2672)

41 (action research and (cultur\* or ethnic\* or ethnocultur\* or transcultur\* or crosscultur\* or multicultural\*).ti,ab,kf,hw. (755)

42 or/25-41 (200866)

43 24 and 42 (11303)

44 (patient\* or consumer\* or audience\* or end user\* or service user\* or client\* or public or parent\* or mother\* or father\* or caregiver\* or care giver\*).ti,ab,kf,hw. (8730104)

45 43 and 44 (6725)

46 limit 45 to english language (6510)
